# Supplementary material for: Effects of Electroacupuncture for Opioid-Induced Constipation in Patients With Cancer in China: A Randomized Clinical Trial
Source: PubMed Central journal article supplement (PMC9947731; doi:10.1001/jamanetworkopen.2023.0310), 2023-02-22
Supplement: jamanetwopen-e230310-s001.pdf [file jamanetwopen-e230310-s001.pdf]

- 1 This supplement contains the following items:
- 2 1. Final protocol, the summary of changes from the published original
- 3 protocol
- 4 2. Final statistical analysis plan, the Summary of Changes of Final SAP.
- 5

6           **Effects of electroacupuncture on opioid-induced constipation in patients with**  
7                           **cancer: a multicenter randomized controlled trial**

8

9    **Clinical Sites:**

- 10   1. Guang'an men Hospital Affiliated to China Academy of Chinese Medical
- 11      Sciences
- 12   2. Guizhou University of Traditional Chinese Medicine
- 13   3. The Affiliated Hospital of Nanjing University of Chinese Medicine
- 14   4. Hunan University of Chinese Medicine
- 15   5. Wangjing Hospital Affiliated to China Academy of Chinese Medical Sciences
- 16   6. Yantai Hospital of Traditional Chinese Medicine
- 17   7. Zhejiang Hospital

18

19    **Data Management and Statistical Centers:**

20   Linkermed Pharm Technology Co. Ltd, Beijing, China

21

22    **Data:**

23    Original protocol date: September 30, 2018

24    Amendment date: November 29, 2019

25

26                                                       **Confidentiality Statement**

27   This document is the intellectual property of the Investigators. The information  
28   provided in this document is strictly confidential and is available for review to the  
29   sponsor, investigators, potential investigators, appropriate Ethics Committees,  
30   Investigational Review Boards, and other government regulatory bodies. No  
31   disclosure should take place without written authorization from the protocol  
32   developing investigators, except to the extent necessary needed to obtain informed  
33   consent from potential subjects.

## Table of Contents

|    |                                                  |    |
|----|--------------------------------------------------|----|
| 34 |                                                  |    |
| 35 |                                                  |    |
| 36 |                                                  |    |
| 37 | 1. Study Contact and Organization .....          | 2  |
| 38 | 1.1 Study Contacts .....                         | 2  |
| 39 | 1.2 Recruiting Sites .....                       | 3  |
| 40 | 1.3 Collaborating Sites .....                    | 5  |
| 41 | 2. Study Design .....                            | 5  |
| 42 | 2.1 Study Overview .....                         | 5  |
| 43 | 2.2 Background .....                             | 5  |
| 44 | 2.3 Study Hypothesis .....                       | 7  |
| 45 | 2.4 Methodology .....                            | 7  |
| 46 | 2.4.2 Subjects .....                             | 8  |
| 47 | 2.4.3 Trial flow chart .....                     | 12 |
| 48 | 2.4.4 Outcomes Measurement .....                 | 15 |
| 49 | 3. Safety Assessment .....                       | 18 |
| 50 | 4. Interventions .....                           | 19 |
| 51 | 4.1 EA .....                                     | 19 |
| 52 | 4.2 SA .....                                     | 20 |
| 53 | 4.3 Rescue medication .....                      | 20 |
| 54 | 5. Informed consent .....                        | 21 |
| 55 | 6. Quality Control .....                         | 25 |
| 56 | 7. Data Management .....                         | 26 |
| 57 | 7.1 The Raw Data Management and Archiving .....  | 26 |
| 58 | 7.2 Data Entry and Storage .....                 | 26 |
| 59 | 7.3 Data Verification and Problems Solving ..... | 27 |
| 60 | 7.4 Medical Coding .....                         | 27 |
| 61 | 7.5 Data Report .....                            | 27 |
| 62 | 7.6 Data Auditing .....                          | 28 |
| 63 | 7.7 Database Locking .....                       | 28 |
| 64 | 8. Statistical Consideration .....               | 28 |
| 65 | 8.1 Statistical Analysis .....                   | 29 |
| 66 | 8.2 Statistical Analysis Plan (SAP) .....        | 29 |
| 67 | 9 Ethical principle .....                        | 29 |
| 68 | 10 Funding .....                                 | 29 |
| 69 | 11 References .....                              | 30 |
| 70 | 12 Major update of the published protocol .....  | 34 |

71

72 **1 Study Contact and Organization**

73 **1.1 Study Contacts**

74 **Guang'anmen Hospital of China Academy of Chinese Medical Sciences:**

75 Zhishun Liu, MD PhD (Principal Investigator for trial)

76 Director of Acupuncture and moxibustion Department

77 5 Beixian'ge Street, Xicheng District, Beijing, China, 100053

78 Phone: +86 10 88002331

79 Email: zhishunjournal@163.com

80

81 Weiming Wang, MD PhD

82 Acupuncture and moxibustion Department

83 5 Beixian'ge Street, Xicheng District, Beijing, China, 100053

84 Phone: +86 10 88002930

85 Email: wangweiming1a1@163.com

86

87 Yuanjie Sun, MD PhD

88 Acupuncture and moxibustion Department

89 5 Beixian'ge Street, Xicheng District, Beijing, China, 100053

90 Phone: +86 10 88001123

91 Email: puzhisun@163.com

92

93 Jinna Yu, MD PhD

94 Acupuncture and moxibustion Department

95 5 Beixian'ge Street, Xicheng District, Beijing, China, 100053

96 Phone: 13520566715

97 Email: 546872837@qq.com

98

99 Lili Zhu, MD

100 Acupuncture and moxibustion Department

101 5 Beixian'ge Street, Xicheng District, Beijing, China, 100053

102 Phone: 18851182160

103 Email: julius.zhu@foxmail.com

104

## 105 **1.2 Recruiting Sites**

### 106 **Guizhou University of Traditional Chinese Medicine**

107 Xiaofang Yang, MD PhD

108 Acumox and Tuina College

109 Dongqing South Road, Huaxi University Town, Guiyang, China, 550025

110 Phone: +86 13984096366

111 Email: yangxiaofang210@163.com

112

113 Chao Liu MD

114 Acumox and Tuina College

115 Dongqing South Road, Huaxi University Town, Guiyang, China, 550025

116 Phone: +86 18798089545

117 Email: 549889429@qq.com

118

### 119 **The Affiliated Hospital of Nanjing University of Chinese Medicine**

120 Jianhua Sun, MD PhD

121 Department of Acupuncture Rehabilitation

122 155 Hanzhong Road, Qinhuai District, Nanjing, Zhejiang, China, 210029

123 Phone: +86 13914722816

124 Email: 377201634@qq.com

125

126 Yuhang Wang, MD

127 Department of Acupuncture Rehabilitation

128 No.155, Hanzhong Road, Qinhuai District, Nanjing, Zhejiang, China, 210029

129 Phone: +86 18752018817

130 Email: wangyuhang@njucm.edu.cn

131

132 **Hunan University of Chinese Medicine**

133 Zenghui Yue, MD

134 College of Acupuncture and Tuina

135 300 Xueshi Road, Yuelu District, Changsha, Hunan, China, 410208

136 Phone: +86 13787293866

137 Email: 624755064@qq.com

138

139 **Wangjing Hospital affiliated to China Academy of Chinese Medical Sciences**

140 Dianrong Lu, MD PhD

141 Department of oncology

142 6 Wangjing Zhonghuan South street, Chaoyang District, Beijing, China, 100102

143 Phone: +86 13717998887

144 Email: ludianrong@aliyun.com

145

146 **Yantai Hospital of Traditional Chinese Medicine**

147 Aihua Hou, MD

148 Department of oncology

149 39 Xingfu Road, Zhifu District, Yantai, Shandong, China

150 Phone: +86 13001616877

151 E-mail: zlk2127926@163.com

152

153 Zhiwei Zang, MD

154 Department of Acupuncture and Massage

155 39 Xingfu Road, Zhifu District, Yantai, Shandong, China

156 Phone: +86 15553553797

157 E-mail: 860922902@qq.com

158

159 **Zhejiang Hospital**

160 Xiaoqing Jin, MD

161 Department of Acupuncture

162 No. 12 Lingyin Road, Hanzhou, Zhejiang, China, 310013

163 Phone: +86 13357102177

164 Email: zjyyjxq@163.com

165

### 166 **1.3 Collaborating Sites**

#### 167 **Dongzhimen Hospital, Beijing University of Chinese Medicine, Beijing, China**

168 Yan Liu, MD

169 Key Laboratory of Chinese Internal Medicine of Ministry of Education

170 5 Haiyuncang Dongcheng, Beijing, China, 100700

171 Phone: +86 13811299493

172 Email: sasliu@yeah.net

173

#### 174 **Catholic Health System Internal Medicine Training Program, University at Buffalo,**

#### 175 **Buffalo, NY**

176 Kehua zhou, MD, DPT

177 Phone: 716 986 4856

178 Email: kehuazho@buffalo.edu

179

## 180 **2. Study Design**

### 181 **2.1 Study Overview**

182 The objective of study is to assess the efficacy of electro-acupuncture (EA) for  
183 opioid-induced constipation(OIC) in adult patients with cancer pain.

### 184 **2.2 Background**

185 In advanced diseases, 70-80% of patients experience moderate to severe pain<sup>1</sup>. As the  
186 cornerstone of treatment for moderate to severe cancer pain, opiate analgesics, such as  
187 morphine and oxycodone, are recommended by WHO Cancer Pain Relief Guidelines<sup>2-3</sup>.

188 The use of systemic opioids is recommended by some studies for cancer patients

189 experiencing moderate to severe pain, regardless of the underlying causes<sup>4</sup>. Opioids  
190 stimulate receptors both in the central nervous system (CNS) and the peripheral nervous  
191 system, reducing pain and improving quality of life for patients<sup>5</sup>. The drug can, however,  
192 be associated with serious adverse events (AEs) with a rate ranging from 1.8% to  
193 13.6%<sup>6-7</sup>, the most common of which is opioid-induced constipation (OIC). OIC  
194 represents a change in baseline bowel habits or defecation patterns that occurs following  
195 the administration or modification of opioid therapy<sup>8-10</sup>. Approximately 41% of  
196 non-cancer patients and 94% of cancer patients who use opioids for pain have this  
197 condition<sup>11-12</sup>. Symptoms of OIC are usually persistent and difficult to tolerate<sup>9</sup>, which  
198 adversely affects patients' quality of life<sup>8, 13-15</sup> and results in reductions in dose or  
199 discontinuation of opioid analgesics<sup>16</sup>. OIC is the result of multiple factors contributing  
200 to it<sup>17</sup>: Opioids may activate  $\mu$ -receptors throughout the gastrointestinal tract and cause  
201 changes to gut motility, decreases in gut secretion, and an increase in sphincter tone,  
202 which can lead to constipation<sup>18</sup>. Various pharmacological and nonpharmacological  
203 interventions are used to manage OIC, such as laxatives and increased fluid intake<sup>8-9, 19</sup>.  
204 However, these interventions are limited in effectiveness, and they do not address the  
205 pathophysiological mechanisms of OIC<sup>8-9</sup>. Several peripherally acting  $\mu$ -opioid receptor  
206 antagonists (PAMORAs), such as naloxegol and methylnaltrexone, have recently been  
207 shown to be effective in treating OIC patients who do not respond to simple medications  
208<sup>20</sup>. However, longer-term efficacy and safety of PAMORAs are unclear, and they haven't  
209 been approved in China yet. Clinical trials are still underway to test these drugs.

210 Additionally, PAMORAs are often associated with AEs such as abdominal pain and  
211 flatulence<sup>21</sup>. As a result, it is still necessary to explore new treatment approaches for OIC.

212 In traditional Chinese medicine, acupuncture has been used to treat gastrointestinal  
213 disease, including constipation, for thousands of years. According to two systematic  
214 reviews, acupuncture can improve spontaneous bowel movements (SBMs) in functional  
215 constipation<sup>22-23</sup>. Additionally, the results of our study indicated that electroacupuncture  
216 (EA) could increase complete spontaneous bowel movements (CSBMs) and SBMs, with  
217 a long-term effect that continues for 24 weeks after treatment ceased among patients with  
218 chronic, severe functional constipation<sup>24-25</sup>. Through stimulation of the somatic and  
219 peripheral nervous systems, acupuncture can facilitate the gut motility and improve



220 gastrointestinal function<sup>26</sup>. The effectiveness of acupuncture for OIC is currently lacking  
221 evidence. The purpose of this study is to compare the efficacy and safety of EA with  
222 sham acupuncture (SA) in the treatment of OIC in cancer patients.

### 223 **2.3 Study Hypothesis**

224 We hypothesize that EA is better than SA in treating OIC in adult patients with cancer  
225 pain.

### 226 **2.4 Methodology**

#### 227 **2.4.1 Trial Design**

228 This is a multicenter, prospective, sham-controlled, parallel-group, subject- and  
229 assessor-blinded, randomized trial at 7 centers in China. Cancer patients must meet the  
230 Rome IV<sup>10</sup> diagnostic criteria for OIC.

##### 231 **2.4.1.1 Randomization**

232 Web-based central randomization will be performed by the Linkermed Pharm Technology  
233 Co. Ltd (Beijing, China). Participants will be randomly allocated, in a 1:1 ratio, to either  
234 the EA or the SA group using permuted block-randomization. Acupuncturists in each  
235 center will be responsible for getting random numbers. Via inputting the screening  
236 information of the participant in the central randomization system through the web, they  
237 will get the random number and group allocation.

##### 238 **2.4.1.2 Blinding**

239 In this study, participants, outcome evaluators, and data analysts will be blinded to the  
240 group assignments. The acupuncturists who perform the treatment will not be blinded due  
241 to the nature of the acupuncture treatment. Participant blinding will be achieved via a  
242 minimal needling at non-acupoints. Bilateral sham points will be attached with the same  
243 EA apparatus using a continuous wave of 10Hz and a current intensity of 0.1–0.2mA for  
244 30 minutes after a brief activation period of 30 seconds.

245 For blinding assessment, all participants will be requested to answer the following  
246 question: “Is EA the acupuncture modality that you have received?” within five minutes  
247 after any treatment at week 8.

248 **2.4.1.3 Sample Size**

249 On the basis of unpublished data, a 14% response rate was assumed for the sham  
250 acupuncture group in this study. We estimated that a sample size of 100 participants  
251 would provide 90% power to detect a between-group difference of 31.4% at the  
252 two-sided significance level of 0.05 and 15% loss to follow-up.

253 **2.4.2 Subjects**

254 Participants with cancer will be publicly recruited from inpatient and outpatient  
255 departments through posters and networks from 6 centers in China.

256 **2.4.2.1 Inclusion Criteria**

257 (1) Cancer patients must meet the Rome IV<sup>10</sup> diagnostic criteria for OIC. Participants  
258 have at least 2 of the following new or worsening symptoms of constipation following  
259 initiation, alteration, or increase in opioid treatment: fewer than three SBMs per week,  
260 straining (>25% of defecations), sensation of incomplete evacuation (>25% of  
261 defecations), lumpy or hard stools (>25% of defecations), and/or sensation of anorectal  
262 obstruction/blockage (>25% of defecations). For patients with a history of chronic  
263 functional constipation, he/she must have worsening symptoms of constipation when the  
264 opioid therapy is initiated, changed, or the dose is increased;(2)Patients recruited in this  
265 trial must have a history of OIC symptoms for at least 1 week;(3)Patients must be  $\geq 18$   
266 years of age and  $\leq 85$  years of age; (4) Patient's cancer condition must be stable with a  
267 life expectancy that is more than six months; (5)Patients must have an Eastern  
268 Cooperative Oncology Group (ECOG)<sup>27</sup> performance status of 0-3; (6)Patients must have  
269 been receiving a stably maintained opioid regimen, consisting of a total daily dose of 30  
270 mg to 1000 mg oral morphine equivalents for at least 2 weeks prior to screening for  
271 cancer pain. Furthermore, it must be anticipated that the opioid will be maintained for at  
272 least 10 weeks;(7)The SBM frequency of the patients must be  $\leq 2$  times a week when  
273 laxatives are not being taken;(8)Patients must be capable of oral intake of drugs, food and  
274 beverages; (9)Provision of written informed consent before inclusion.

275 **2.4.2.2 Exclusive Criteria**

276 Participants will be excluded from this trial if they have any of the following conditions:

277 (1) Patients diagnosed with clinically significant abnormal defecation due to functional

278 disorders or structural abnormalities of the gastrointestinal tract and other tissues related  
279 to gastrointestinal tract (not including OIC): inflammatory bowel disease, irritable bowel  
280 syndrome, rectal prolapse, gastrointestinal obstruction, peritoneal metastasis, or  
281 peritoneal tumor at the time of enrollment; (2)Patients with a history of gastrointestinal  
282 tract operation, abdominal operation, or abdominal adhesion within one month prior to  
283 screening; history of intestinal obstruction within three months prior to screening;  
284 (3)Diagnosis of active diverticular disease; or severe hemorrhoid; or anal fissure; or  
285 artificial rectum or anus;  
286 (4) Patients with an intraperitoneal catheter or those that use a feeding tube to maintain  
287 vital signs; (5)Diagnosis of pelvic disorder, which are considered to have obvious effects  
288 on the intestinal transport of feces (such as uterine prolapse  $\geq$ degree 2, uterine fibroids  
289 [located in the posterior of the uterus with a diameter  $\geq$  5 cm] affecting bowel movement);  
290 (6)Patients that are being treated with a new cancer chemotherapy, which had never been  
291 administered in the past, within 14 days of the screening or are scheduled to receive such  
292 therapy during the study; (7)Patients that received radiotherapy within 28 days of the  
293 screening or are scheduled to receive such therapy during the study; (8)Patients that  
294 underwent a surgery or intervention that is considered to have an obvious effect on the  
295 gastrointestinal functions within 28 days of the screening or are scheduled to receive  
296 surgery or intervention which is considered to have obvious effects on the gastrointestinal  
297 functions during the study, or scheduled to receive surgery or intervention which will be  
298 anticipated to prevent the patients from completing the trial; (9)Patients with uncontrolled  
299 hyperthyroidism, severe hypertension, heart disease, systematic infection or blood  
300 coagulation disorders (hypercoagulation status or hemorrhagic tendency); (10)Patients  
301 that consumed  $>4$  additional opioid doses per day, for breakthrough pain, for more than 3  
302 days during the baseline period, or if their maintenance opioid dosing regimen was  
303 modified during this period; (11)Patients with severe cancerous pain (e.g., typical average  
304 daily pain intensity rating of 7 to 10 on a numerical rating scales (NRS; 0 [no pain] to 10  
305 [the worst pain possible]) after the utility of routine dose and frequency of opioids)  
306 refractory to opioid therapy;(12) Patients with a history of opioid discontinuation due to  
307 severe adverse events or patients that are suspected to discontinue opioid use due to the  
308 potential risk of adverse events; (13)Patients that received an opioid receptor antagonist

309 or agonist within one month of the screening, or those who are scheduled to receive such  
310 therapy during the study; (14) Patients with a history of nerve neurolysis;(15) Patients  
311 with severe cognitive impairment, aphasia, or psychiatric disorders; abdominal aortic  
312 aneurysm; hepatomegaly(liver span > 14cm at the mid-clavicular line by ultrasound  
313 examination); or splenomegaly (spleen length [cranial to caudal] > 13cm by ultrasound  
314 examination);(16) Patients that have received acupuncture within three months of the  
315 screening; (17)Other patients who are considered ineligible for the study by the  
316 investigator on the basis of concomitant therapy and medical findings.

#### 317 **2.4.2.3 Subject Withdrawals**

318 There will be at least one oncologist or gastroenterologist in each center. They will assess  
319 the severe adverse events (SAEs) and then determine whether the participant to continue  
320 or terminate the trial. Subjects may leave the study at their own discretion, or the  
321 investigator may determine whether it is in the best interest of subjects to withdraw from  
322 the trial due to worsening of symptoms, or the occurrence of a serious adverse event.

#### 323 **2.4.2.4 Subject Recruitment, Screen and Grouping Assignment**

324 Participants with cancer will be publicly recruited from inpatient and outpatient  
325 departments through posters and networks. Research assistants of each site will  
326 preliminarily screen the participants by recording their disease condition, history of the  
327 disease and treatment, and the demographic data. An oncologist or gastroenterologist of  
328 each site will take charge of the diagnosis and the differential diagnosis of the OIC.  
329 Potential participants will fill out a 1-week patient diary to record bowel movements, the  
330 stool consistency, degree of difficulty in defecation, the rescue medicine drugs and  
331 duration of usage, and the intensity of cancerous pain, etc. Eligible participants then will  
332 be randomized to EA or SA group. Acupuncturists are in charge of the participants' group  
333 assignment, and the EA or SA treatments. They are also responsible for the assessment of  
334 safety during treatment. During the trial, the professional evaluators of each site will  
335 instruct the participants how to fill in patients' self- assessment related to the trial and  
336 their patient diaries and the evaluators will record the data on the case report form (CRF)  
337 through the whole trial period. The subject flow was shown in Figure 1.

338

339

340  
341

**Figure 1. Subject flow**

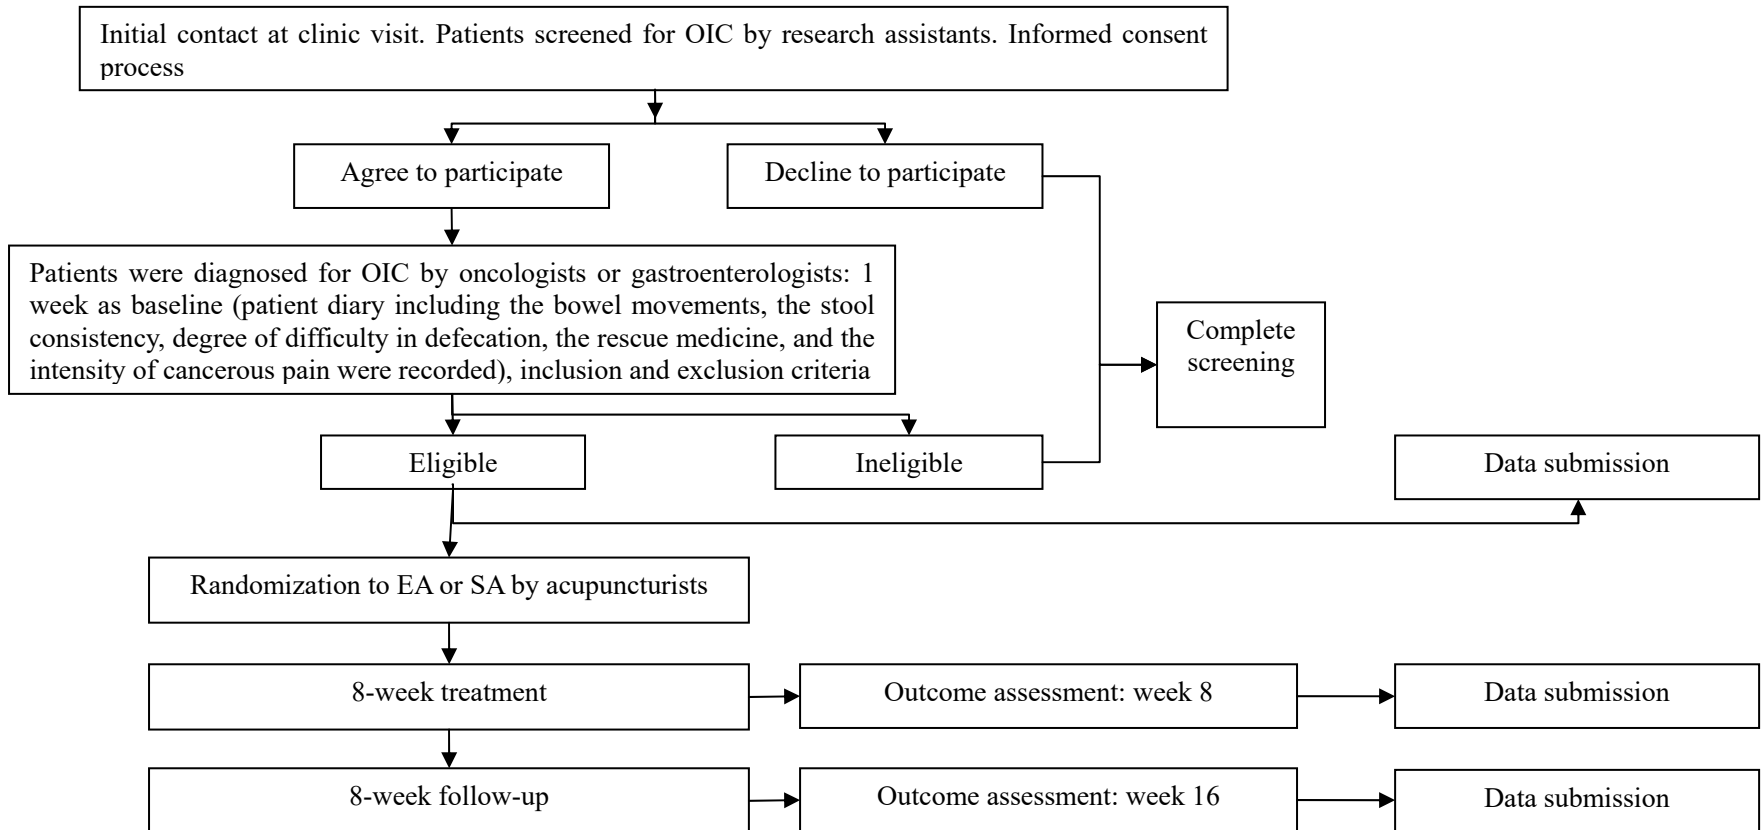

342  
343

344

345 **2.4.3 Trial flow chart**

346

**Figure 2.Trial flow chart**

| <b>Enrollment</b>                       | <b>Study Period</b> |                   |                  |                  |
|-----------------------------------------|---------------------|-------------------|------------------|------------------|
|                                         | <b>Baseline</b>     | <b>Allocation</b> | <b>Treatment</b> | <b>Follow-up</b> |
|                                         | Weeks -1            | Week 0            | Weeks 1 to 8     | Weeks 13 to 16   |
| Eligibility criteria                    | ×                   |                   |                  |                  |
| Demography characteristics              | ×                   |                   |                  |                  |
| Disease history of cancer               | ×                   |                   |                  |                  |
| Disease history of OIC and constipation | ×                   |                   |                  |                  |
| Eligibility screen                      | ×                   |                   |                  |                  |
| Informed consent                        | ×                   |                   |                  |                  |
| Allocation                              |                     | ×                 |                  |                  |
| <b>Interventions</b>                    |                     |                   |                  |                  |
| Electroacupuncture                      |                     |                   | ×                |                  |
| Sham electroacupuncture                 |                     |                   | ×                |                  |
| <b>Assessments</b>                      |                     |                   |                  |                  |
| SBMs                                    | ×                   |                   | ×                | ×                |
| CSBMs                                   | ×                   |                   | ×                | ×                |

|                                                                  |   |  |   |                |
|------------------------------------------------------------------|---|--|---|----------------|
| Mean Bristol Stool Form Scale score for stool consistency of SBM | × |  | × | ×              |
| Mean score for straining of SBM                                  | × |  | × | ×              |
| PAC-SYM total score and subscale scores                          | × |  | × | ×              |
| PAC-QOL total score and subscale scores                          | × |  | × | ×              |
| Patients' global assessment of treatment efficacy                |   |  | × | ×              |
| Rescue medicine usage                                            | × |  | × | × (weeks 9-16) |
| Opioid usage                                                     | × |  | × | × (weeks 9-16) |
| Patients' expectation of the acupuncture efficacy                | × |  |   |                |
| Blinding assessment                                              |   |  | × |                |
| Cancer pain                                                      |   |  | × | ×              |
| Adverse events                                                   | × |  | × | × (weeks 9-16) |
| Safety assessment                                                | × |  | × | × (weeks 9-16) |

347 Abbreviations: OIC, Opioid-induced constipation; SBMs, spontaneous bowel movements; CSBMs, complete spontaneous bowel  
348 movements; PAC-SYM, Patient Assessment of Constipation-Symptom questionnaires; PAC-QOL, Patient Assessment of  
349 Constipation-Quality of Life questionnaires.

350 **Figure 3.** The schedule of enrollment, interventions, and assessments

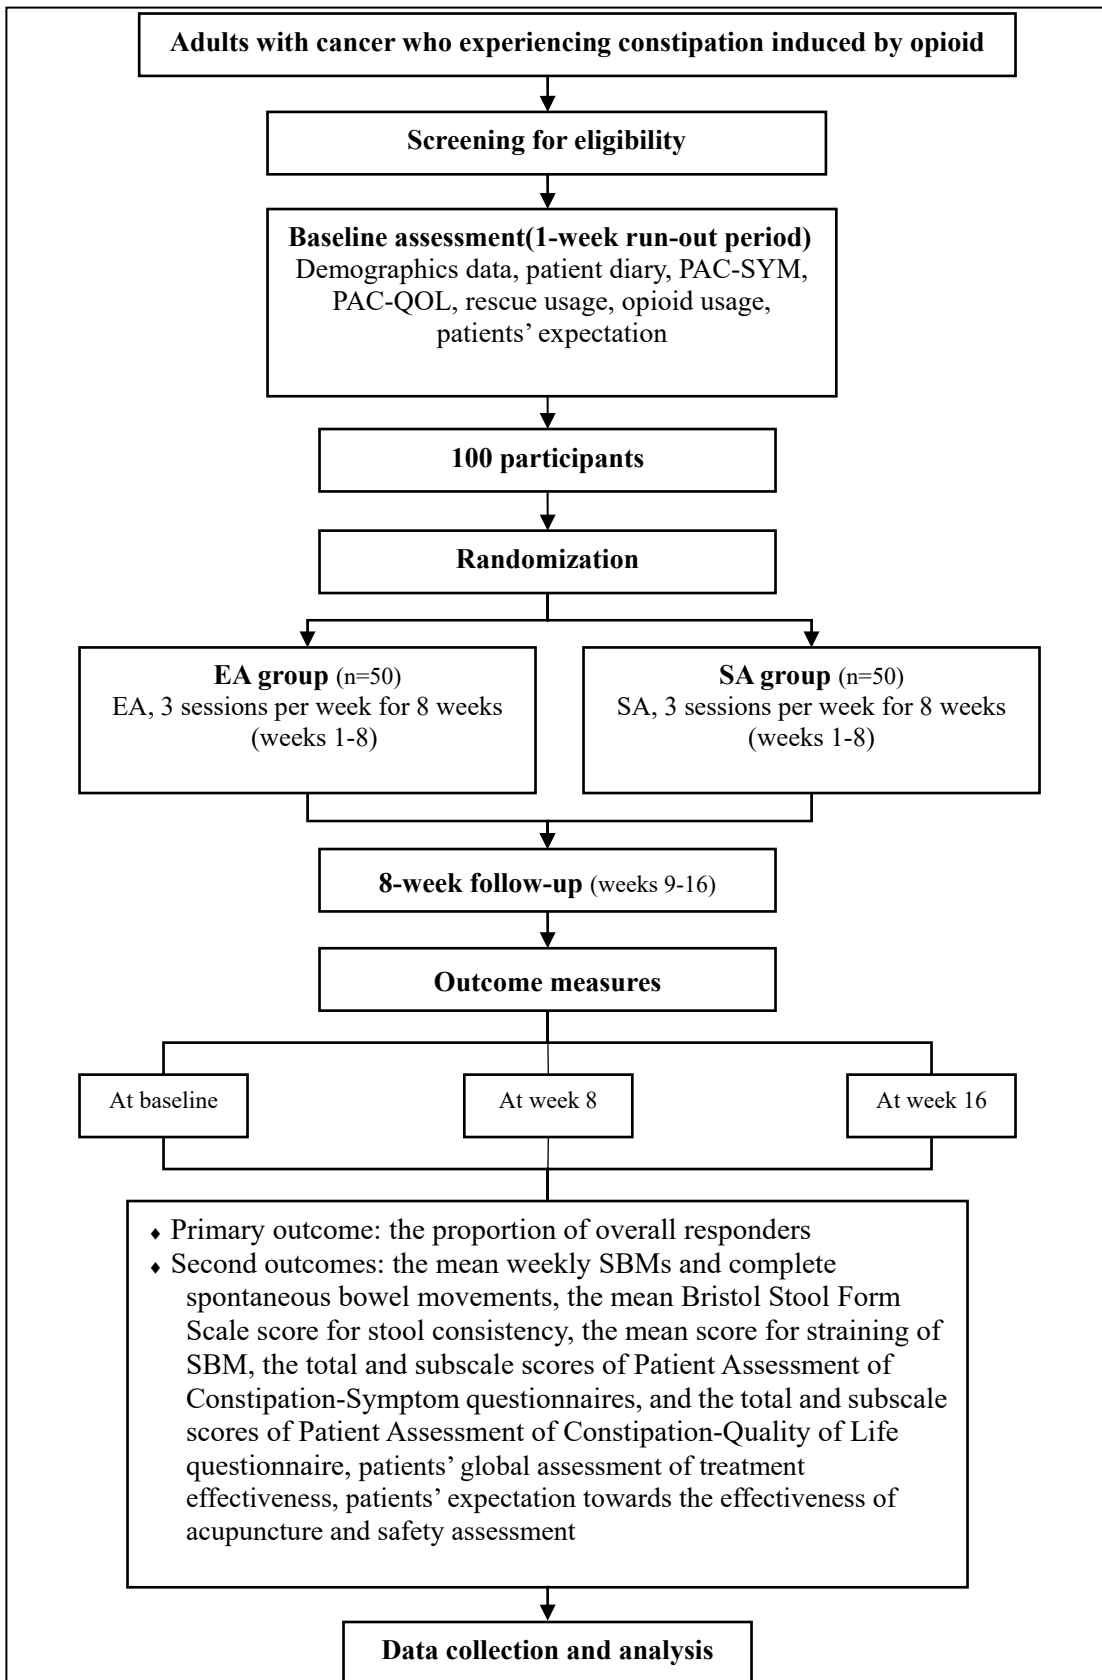



351 **2.4.4 Outcomes Measurement**

352 **2.4.4.1 Primary Outcome**

353 The primary outcome will be the proportion of overall responders, defined as a patient  
354 that has  $\geq 3$  SBMs/wk and  $\geq$  increase of 1 SBM from baseline simultaneously for at least  
355 6 out of 8 weeks of the treatment period. SBM refers to a bowel movement that occurred  
356 without medication or assistance within the previous 24 hours. When a bowel movement  
357 occurs within 24 hours of the use of an optional assisted method (rescue medication or  
358 other bowel-treatment regimens) for defecation, it is not regarded as an SBM.

359 Every participant will be required to keep a diary 13 weeks: baseline (run-out  
360 period before randomization), 8 weeks of treatment, and 4 weeks of follow-up. Diary  
361 entries include the frequency of bowel movements, the consistency of the stool, the  
362 difficulty in defecating, the rescue medicine drugs applied and their duration, and the  
363 intensity of the cancer pain. During the treatment period, the diary will be collected  
364 weekly, and during the follow-up period, it will be collected at the end of week 16. The  
365 outcome evaluators will examine the diary content and determine the SBM and frequency  
366 accordingly.

367 **2.4.4.2 Secondary Outcomes**

368 (1) Changes in the mean weekly SBMs from the baseline during weeks 1-8 and weeks  
369 13-16. The mean weekly SBMs equals the total frequency of SBMs divided by the  
370 numbers of week(s) recorded. Assessment time frame: at baseline, over weeks 1-8 and  
371 13-16.

372 (2) The proportion of patients with  $\geq 3$  mean weekly SBMs during weeks 1-8 and weeks  
373 13-16. Assessment time frame: at baseline, over weeks 1-8 and 13-16.

374 (3) The proportion of patients with an increase of  $\geq 1$  mean weekly SBM from the  
375 baseline during weeks 1-8 and weeks 13-16. Assessment time frame: at baseline, over  
376 weeks 1-8 and 13-16.

377 (4) A change in the mean weekly CSBMs from the baseline during weeks 1-8 and weeks  
378 13-16. A CSBM is defined as an SBM with the feeling of complete evacuation. The mean  
379 weekly CSBMs equals the total frequency of CSBMs divided by number of week(s)

380 recorded. Assessment time frame: at baseline, over weeks 1-8 and 13-16.

381 (5) The proportion of patients with  $\geq 3$  mean weekly CSBMs during weeks 1-8 and

382 weeks 13-16. Assessment time frame: at baseline, over weeks 1-8 and 13-16.

383 (6) The proportion of patients with an increase of  $\geq 1$  mean weekly CSBM from the

384 baseline during weeks 1-8 and weeks 13-16. Assessment time frame: at baseline, over

385 weeks 1-8 and 13-16.

386 (7) A change in the mean Bristol Stool Form Scale score for stool consistency of SBMs

387 from the baseline during weeks 1-8 and weeks 13-16. For stool consistency, each patient

388 will be asked to record their stool consistency according to the Bristol Stool Form Scale<sup>28</sup>

389 on the following seven points scale (scored from 1 to 7 for stool types 1 to 7,

390 respectively). Assessment time frame: at baseline, over weeks 1-8 and 13-16.

| Bristol stool form scale                                                              |                                                                  |
|---------------------------------------------------------------------------------------|------------------------------------------------------------------|
| type de selles                                                                        | description                                                      |
| 1    | selles dures en forme de billes détachées (selles difficiles)    |
| 2  | selles en forme de billes collées                                |
| 3  | selles en forme de boudin, structure friable                     |
| 4  | selles en forme de boudin, structure douce et lisse              |
| 5  | selles molles avec contours clairement tranchés (selles faciles) |
| 6  | selles molles à très molles aux contours imprécis                |
| 7  | selles aqueuses sans structure (totalement liquides)             |

Reproduced by kind permission of Dr. Vito Martin, Reader in Medicine at the University of Bristol. ©2009 Produced by Norgine Limited, manufacturer of Miralax®.

- Type 1: Separate hard lumps, like nuts (hard to pass)
- Type 2: Sausage-shaped, but lumpy
- Type 3: Like a sausage but with cracks on its surface
- Type 4: Like a sausage or snake, smooth and soft
- Type 5: Soft blobs with clear cut edges (passed easily)
- Type 6: Fluffy pieces with ragged edges, a mushy stool
- Type 7: Watery, no solid pieces. Entirely liquid

391 (8) A change in the mean score for the straining of SBMs from the baseline during

392 weeks 1-8 and weeks 13-16. For assessment of the straining of SBMs, each patient will

393 be asked to rate his/her score of straining, using the following five-point scale<sup>29</sup>: not at all

394 difficult (0), a little bit difficult (1), moderately difficult (2), quite a bit difficult (3),

395 extremely difficult (4). Assessment time frame: baseline, over weeks 1-8 and 13-16.

396 (9) A change in the total and subscale score of the Patient Assessment of  
397 Constipation-Symptom (PAC-SYM) questionnaire from the baseline at weeks 8 and 16.  
398 The PAC-SYM is a questionnaire used to evaluate the severity of chronic constipation in  
399 the past 2 weeks. It consists of 12 items, which are subdivided into abdominal (4 items),  
400 rectal (3 items), and stool (5 items) scales.<sup>34 36</sup> The score of each item ranges from 0 to  
401 4, with 0 = symptom absent, 1 = mild, 2 = moderate, 3 = severe and 4 = very severe.  
402 Lower scores indicate a lower symptom burden. Each subscale score will be calculated as  
403 the mean of the completed items for that subscale. The total score will be calculated as  
404 the mean of all completed items. In this trial, the Chinese version of PAC-SYM, which  
405 has been validated to have a satisfactory psychometric property<sup>30</sup>, will be used.  
406 Assessment time frame: at baseline, at weeks 8 and 16.

407 (10) A change in the total and subscale scores of the Patient Assessment of  
408 Constipation-Quality of Life (PAC-QOL) questionnaires from the baseline at weeks 8 and  
409 16. The PAC-QOL is a 28-item self-reported questionnaire to assess the burden of  
410 constipation on patients' everyday functioning and well-being in the 2 weeks (14 days)  
411 prior to assessment<sup>31</sup>. This questionnaire is divided into four subscales: physical  
412 discomfort (items 1-4), psychosocial discomfort (items 5-12), worries/concerns (items  
413 13-23), and satisfaction (items 24 to 28). Each of the item scores ranges from 0 (not at all)  
414 to 4 (extreme), with lower scores indicating a better quality of life. For each visit,  
415 individual subscale scores will be calculated as the mean of the completed items for that  
416 subscale. The total score will be calculated as the mean of all of the completed items. We  
417 will use the Chinese version of this test<sup>32</sup> in our trial, which has been demonstrated to be  
418 a reliable and valid tool. Assessment time frame: at baseline, at weeks 8 and 16.

419 (11) Patients' global assessment of treatment efficacy. Each patient will be asked to rate  
420 his/her efficacy of treatment using the following 7-point self-reporting scale: markedly  
421 worse (1), moderately worse (2), slightly worse (3), no change (4), slightly improved (5),  
422 moderately improved (6), markedly improved (7). Scales with seven response categories  
423 are easy to use and have shown a high reliability and validity<sup>33</sup>. This questionnaire will be  
424 completed at week 8 and week 16. Assessment time frame: baseline, at weeks 8 and 16.

425 (12) The proportion of patients using rescue medicine and the mean frequency of rescue  
426 medicine use per week during weeks 1-8 and weeks 9-16. Assessment time frame: at

427 baseline, over weeks 1-8 and 13-16.

428 Other Pre-specified Outcome Measures

429 (13) The proportion of patients discontinuing the opioid, and those with a  $\geq 30\%$  weekly  
430 mean increase or decrease in the dose of opioid from baseline during weeks 1-8 and  
431 weeks 9-16. Assessment time frame: at baseline, at weeks 8 and 16.

432 (14) The proportion of patients with a change from baseline in anti-tumor therapy that  
433 could impair the defecation during weeks 1-8 and weeks 9-16. Assessment time frame: at  
434 baseline, at weeks 8 and 16.

435 (15) Patients' belief in the efficacy of acupuncture. Participants will be asked to answer  
436 the following questions at baseline: "Do you think acupuncture will be effective in  
437 treating the disease in general?" and "Do you think acupuncture will be effective in  
438 improving the OIC?" For each question, patients will choose one of the following  
439 answers: "unclear/whatever", "Yes", or "No". Assessment time frame: at baseline.

440 (16) Blinding assessment. The blinding is regarded as successful when a patient guesses  
441 he/she has received a conventional EA. Before treatment, we told patients that they had a  
442 50% chance of receiving conventional electroacupuncture (EA) with a deeper insertion  
443 versus minimal electroacupuncture (SA) a superficial penetration. Conventional  
444 electroacupuncture and minimal electroacupuncture have a possible similar efficacy. Both  
445 treatments used a relatively small electric intensity, and they may or may not feel the  
446 stimulation during treatment. Patients were treated separately to avoid communication.  
447 To assess the success of blinding, within 5 minutes after treatment at week 8, patients  
448 were asked to guess whether they received conventional EA. Assessment time frame: at  
449 week 8.

### 450 **3. Safety Assessment**

451 All adverse events (AEs) will be recorded throughout the whole trial in Adverse Event  
452 Form (AEF) by patients themselves and outcome assessors. In our trial, the serious AEs  
453 will be defined as events that cause death, exacerbation of the preexisting condition,  
454 interruption of treatment, prolongation of existing hospitalization, permanent disability or

455 damage, or required medical intervention to prevent one of the above outcomes. AEs will  
456 be categorized as treatment related or non-treatment related based on its potential  
457 association with acupuncture needling procedure by acupuncturists and related specialists  
458 within 24 hours. The treatment related AEs defined as follows: dizziness, fainting,  
459 localized hematoma, localized minor infection, or some discomforts after acupuncture.  
460 Safety assessments also include an 11-point NRS (0 indicates no pain, and 10 indicates  
461 the severest pain) to evaluate the intensity of cancer pain. The mean and largest intensity  
462 of cancer pain during the preceding week will be evaluated at baseline, as well as weeks  
463 2, 4, 6, 8 and 16.

#### 464 **4. Interventions**

465 The intervention scheme of this trial is based on our previous trials regarding acupuncture  
466 for functional constipation<sup>24, 25</sup>. Acupuncturists who had an acupuncture license and at  
467 least 2 years of clinical experience in acupuncture will perform the treatment. We will use  
468 disposable acupuncture needles (of the following sizes: 0.30 × 40, 0.30 × 50 and 0.30 ×  
469 75 mm) and SDZ-V EA apparatus (all Hwato Brand, Suzhou Medical Appliance Factory,  
470 Suzhou, China) in this trial. The duration of the trial for each participant will be 17 weeks:  
471 1- week baseline assessment (run-out period), 8- week treatment and 8- week follow- up.

#### 472 **4.1 EA**

473 Bilateral Tianshu (ST25), Fujie (SP14), Shangjuxu (ST37) will be used in the EA group.  
474 The location of the acupoints will be based on Nomenclature and location of acupuncture  
475 points<sup>34</sup> drafted in 2006 by the National Standard of the People's Republic of China  
476 (GB/T 12346–2006). The local skin will be routinely sterilized while the patient is in a  
477 supine position. For ST25 and SP14, 0.30×50 mm or 0.30×75 mm needles will be gently  
478 vertically inserted to the muscle layer of the abdominal wall, where patients will feel  
479 sharp pain and acupuncturists will feel resistance from the needle tip. For ST37, 0.30×40  
480 mm needles will be vertically inserted approximately 15 mm deep, followed by  
481 three-time manipulation of even lifting and twisting method to elicit the sensation of deqi.  
482 Paired alligator clips of the EA apparatus will then be attached to the needle holders of

483 the bilateral ST25, SP14, and ST37. The stimulation will be retained for 30 minutes, with  
484 a continuous wave of 10 Hz and current intensity of 0.5 to 4 mA. All needles will be  
485 removed after 30 minutes and pressure will be applied using a dry sterilized cotton ball to  
486 avoid bleeding. Patients will be followed up for another 8 weeks after the treatment  
487 stopped.

## 488 **4.2 SA**

489 The patients in the SA group will receive minimal needling at non-acupoints as bilateral  
490 sham ST25, SP14, and ST37. The sham ST25 and SP14 are located 2 cm horizontally  
491 outward of the points stimulated in the EA group. The sham ST37 point is located outward  
492 of ST37 in the middle of the stomach and gallbladder channel. After sterilization of the  
493 skin, 0.30×40 mm needles will be directly inserted about 2-3 mm until they can stand up  
494 when attached by the alligator clips. No manipulation will be used and no deqi sensation  
495 will be elicited at any of the sham points. The bilateral sham ST25, SP14, and ST37  
496 points will be attached by the same EA apparatus with a continuous wave of 10 Hz and  
497 current intensity of 0.1 to 0.2 mA for 30 minutes with only the initial 30 seconds on.

498

499 Patients in both groups will receive 24 treatment sessions over an 8-week period (3  
500 sessions each week, ideally every other day). Each session will last for 30 minutes.  
501 Patients will be treated separately to prevent between-patient communication. Patients  
502 will be followed up for another 8 weeks after the treatment stopped.

## 503 **4.3 Rescue medication**

504 During the trial, other medication or intervention for OIC will be discouraged. However,  
505 if a patient has no bowel movement for 72 consecutive hours and cannot tolerate it, only  
506 bisacodyl (5 to 10 mg; up to 20 mg per day) or a 110ml glycerol enema will be permitted  
507 as a rescue medication. Details of drug use (time and frequency) will be recorded.

508 **5. Informed consent**

509 **Informed Consent: Study Introduction**

510 Dear participants:

511 Opioid analgesics, such as morphine and oxycodone, are recommended as the  
512 cornerstone for the management of moderate to severe cancer pain by WHO Cancer Pain  
513 Relief Guidelines. Opioid-induced constipation (OIC) is the most prevalent serious  
514 adverse events (AEs). It is reported in 94% of cancer patients who take opioids for pain.  
515 OIC is defined as a change in baseline bowel habits or defecatory patterns following the  
516 initial administration or modification of opioid therapy.

517 Unlike many other opioid-related AEs, the symptoms of OIC tend to be persistent and  
518 difficult to tolerate, which can adversely reduce patients' quality of life. The mechanism  
519 of OIC involves multiple contributing factors: exogenous opioids can activate  $\mu$ -receptors  
520 throughout the gastrointestinal tract and lead to a change in gut motility, a decrease in gut  
521 secretion and an increase in sphincter tone, which will result in OIC. The management of  
522 OIC is multifaceted, involving a combination of pharmacological and  
523 non-pharmacological interventions, such as laxatives and increased fluid and fiber intake.  
524 However, the efficacy of these interventions is limited and these approaches do not  
525 address all of the underlying pathophysiological mechanisms of OIC. Recently,  
526 peripherally acting  $\mu$ -opioid receptor antagonists (PAMORAs), such as naloxegol and  
527 methylnaltrexone, have been shown to be effective in treating OIC patients who response  
528 poorly to simple laxatives. However, these drugs are still under test in clinical trials with  
529 unclear long-term efficacy and safety; they have not been approved for use in China. In  
530 addition, the use of PAMORAs is often accompanied by AEs of abdominal pain and  
531 flatulence. At present, traditional Chinese medicine, glycerin enema and other methods  
532 are also can be used to treat OIC.

533 If you have been experiencing cancer-related pain and were haunted by the symptom  
534 of OIC. We invite you to participate in the study. This study was supported and funded by  
535 the 2019 National Administration of Traditional Chinese Medicine "Project of building  
536 evidence-based practice capacity for TCM--Project BEBPC-TCM" (NO. 2019XZZX-ZJ).  
537 The objective of this study is to assess the efficacy and safety of EA compared to sham

538 acupuncture (SA) in the treatment of OIC in patients with cancer. Participating in this  
539 study can relieve symptoms of OIC while also contributing to the development of  
540 medicine, especially for acupuncture and moxibustion of Traditional Chinese medicine.

541 Patients with the following conditions should not participate in this study: If you cannot  
542 participate in the study, we will provide free scale testing and related consultation.

543

544 (1) Patients diagnosed with clinically significant abnormal defecation due to structural  
545 abnormalities of the gastrointestinal tract and other tissues related to gastrointestinal tract  
546 (not including OIC): inflammatory bowel disease, rectal prolapse, gastrointestinal  
547 obstruction, peritoneal metastasis, or peritoneal tumor at the time of enrollment;

548 (2) Patients with a history of gastrointestinal tract operation, abdominal operation, or  
549 abdominal adhesion within one month prior to screening; history of intestinal obstruction  
550 within three months prior to screening;

551 (3) Diagnosis of active diverticular disease; or severe hemorrhoid; or anal fissure; or  
552 artificial rectum or anus;

553 (4) Patients with an intraperitoneal catheter or those that use a feeding tube to maintain  
554 vital signs;

555 (5) Diagnosis of pelvic disorder, which are considered to have obvious effects on the  
556 intestinal transport of feces (such as uterine prolapse  $\geq$  degree 2, uterine fibroids  
557 [located in the posterior of the uterus with a diameter  $\geq$  5 cm] affecting bowel  
558 movement);

559 (6) Patients that are being treated with a new cancer chemotherapy, which had never  
560 been administered in the past, within 14 days of the screening or are scheduled to receive  
561 such therapy during the study;

562 (7) Patients that received radiotherapy within 28 days of the screening or are scheduled  
563 to receive such therapy during the study;

564 (8) Patients that underwent a surgery or intervention that is considered to have an  
565 obvious effect on the gastrointestinal functions within 28 days of the screening or are  
566 scheduled to receive surgery or intervention which is considered to have obvious effects  
567 on the gastrointestinal functions during the study, or scheduled to receive surgery or  
568 intervention which will be anticipated to prevent the patients from completing the trial;



- 569 (9) Patients with uncontrolled hyperthyroidism, severe hypertension, heart disease,  
570 systematic infection or blood coagulation disorders (hypercoagulation status or  
571 hemorrhagic tendency);
- 572 (10) Patients that consumed >4 additional opioid doses per day, for breakthrough pain,  
573 for more than 3 days during the baseline period, or if their maintenance opioid dosing  
574 regimen was modified during this period;
- 575 (11) Patients with severe cancerous pain (e.g., typical average daily pain intensity rating  
576 of 7 to 10 on a numerical rating scales (NRS; 0 [no pain] to 10 [the worst pain possible])  
577 after the utility of routine dose and frequency of opioids) refractory to opioid therapy;
- 578 (12) Patients with a history of opioid discontinuation due to severe adverse events or  
579 patients that are suspected to discontinue opioid use due to the potential risk of adverse  
580 events;
- 581 (13) Patients that received an opioid receptor antagonist within one month of the  
582 screening, or those who are scheduled to receive such therapy during the study;
- 583 (14) Patients with a history of nerve neurolysis;
- 584 (15) Patients with severe cognitive impairment, aphasia, or psychiatric disorders;  
585 abdominal aortic aneurysm; hepatomegaly(liver span > 14cm at the mid-clavicular line  
586 by ultrasound examination); or splenomegaly(spleen length [cranial to caudal] > 13cm by  
587 ultrasound examination);
- 588 (16) Patients that have received acupuncture within three months of the screening;
- 589 (17) Other patients who are considered ineligible for the study by the investigator on the  
590 basis of concomitant therapy and medical findings.

591 We plan to enroll a total of 100 participants with 50 in each group in this trial. If the  
592 patients can participate in this study, doctors will randomly assign them to conventional  
593 electroacupuncture(EA) group or minimal electroacupuncture group. Each patient will  
594 have a 50% chance to be in the EA group or minimal electroacupuncture group.  
595 Patients in both groups will receive 24 treatment sessions over an 8-week period (3  
596 sessions each week, ideally every other day). Patients will be followed up for another 8  
597 weeks after the treatment stopped. During the study period, subjects are required to  
598 cooperate with doctors to complete relevant scales and carry out necessary auxiliary  
599 examinations, as well as to adherence to the schedule for treatment, examination, and

600 follow-up visit. Additionally, you are also responsible for reporting any changes in your  
601 physical and mental status to your doctor during the study process regardless of whether  
602 you think these changes are related to the study or not. During the trial, other  
603 medication or intervention for OIC will be discouraged. However, if a patient has no  
604 bowel movement for 72 consecutive hours, only bisacodyl (5 to 10 mg; up to 20 mg per  
605 day) or a 110ml glycerol enema will be permitted as a rescue medication. Details of drug  
606 use (time and frequency) will be recorded. The doctors will make every effort to prevent  
607 and treat any side effects brought on by this study. During acupuncture treatment, you  
608 may feel soreness, numbness, heavy, distension sensation, etc., which are normal  
609 reactions to acupuncture. Acupuncture treatment may have some adverse effects (e.g.,  
610 dizziness, fainting, localized hematoma, localized minor infection), but it is rare and mild.  
611 We promise that in case of adverse events, we will do our best to provide treatment in  
612 accordance with the routine diagnosis and treatment according to professional judgment,  
613 and will follow the condition until it stabilizes or until the event is otherwise explained.  
614 The hospital will bear all the costs. Free treatment, consultation and scale measurement  
615 will be provided throughout the trial (including the follow-up period). You and your legal  
616 representative will be promptly notified of any information that may affect the subject's  
617 participation in the study. Whether to participate in this study will be entirely determined  
618 by the patients themselves, and the subjects' privacy will be kept strictly confidential  
619 within the scope of the law. Only the institutes responsible for the study, clinical research  
620 institutes, and ethics committees may have access to your medical records to verify  
621 clinical trial procedures and data. Your name will not appear in any publications or  
622 reports related to this study. Subjects have the right to withdraw from the study at any  
623 time during the study without any discrimination or retaliation, and without affecting any  
624 medical services. For your best interests (such as unbearable acupuncture pain or severe  
625 AEs), researchers may terminate your participation at any time during the study. Personal  
626 data of participants in the study are kept confidential. If you need more information, feel  
627 free to talk to your doctor. Subjects are entitled to ask our physicians at any time and to  
628 contact the ETHICS committee office if they have complaints.

629

630 Patient statement

631 I have been informed of the research purpose, content and method of this research, and I  
632 have fully understood the nature, significance, and possible risks and benefits of this  
633 research. I have the right to participate in this study voluntarily or not. My personal  
634 information will be kept confidential. I grant access to the study data to the DRUG  
635 regulatory agency or the ethics committee.

636 I have fully understood the above and made the decision on my own after full  
637 consideration: I volunteered to be a subject in the study "Effects of electroacupuncture on  
638 opioid-induced constipation in patients with cancer: a multicenter randomized controlled  
639 trial". I am willing to accept research requests and cooperate with researchers. I am  
640 willing to actively cooperate with relevant examinations and fulfill the rights and  
641 obligations of subjects to ensure the final completion of this study.

642 Signature of patient Year month day

643 Telephone:

644

645 Researcher declaration:

646 I have carefully explained to the subjects the situation of this study and the benefits  
647 and risks of participating in this study. His signature is valid. Medical problems, language  
648 or education do not preclude an understanding of the above.

649 Signature of researcher Year month day

650 Telephone:

651 :

## 652 **6. Quality Control**

653 All staff members will undergo training prior to the trial. Monitors will check the case  
654 report forms and the acupuncture operation regularly. To improve adherence to  
655 intervention protocols, the majority of patients will come from the inpatient setting. The  
656 outcomes will be evaluated by independent assessors who are unaware of the group  
657 allocation. The data will be input by a clinical research coordinator according to the

658 contents of CRF using the Electronic Data Capture System (EDC), which will be  
659 monitored by Clinical Research Associate. Detailed documentation of drop-outs and  
660 withdrawals, including the reasons, will be obtained throughout the trial. All of the  
661 investigators will always maintain a strict privacy policy to protect confidentiality before,  
662 during and after the trial.

663

## 664 **7. Data Management**

### 665 **7.1 The Raw Data Management and Archiving**

666 We use Electronic Data Capture System (EDC) system to perform data entry. The  
667 research assistants will fill out all the electrical CRF through RDC system. Researchers  
668 will inspect the eCRF, and signed electrically for the eCRF going into effect. The eCRF  
669 and the trace of eCRF revising will be left in the Oracle database.

### 670 **7.2 Data Entry and Storage**

#### 671 **7.2.1 Database Building and Testing, Data Entry Interface**

672 The eCRF will be noted through CDISC SDTM standard, and the data entry interface  
673 will be generated through the Oracle Clinical software. The data entry interface should be  
674 in accordance with the paper-version CRF as far as possible. The inputted data will be  
675 stored in the Oracle database.

676 After preliminarily setting up the database, the entry clerks will input some analog data  
677 according to the CRF to test the database. The testing contains: (1) the agreement of the  
678 data entry interface and the paper-version CRF; (2) the agreement of the exported data  
679 from the database and the analog data; (3) the agreement of the structure of the exported  
680 database and the paper-version CRF. After the testing, data administrators should revise  
681 the database and make a testing report. Then they electrically signed on the approval page  
682 of the database to indicate that the testing is completed. The electrical files of the analog

683 CRF, Noted CRF, screenshot of the data entry interface, database testing report, and the  
684 approval page of the database should be saved. If the database updates during the trial,  
685 the electrical files mentioned above are also need to be updated.

### 686 **7.2.2 Data Entry and Inspection**

687 The research assistants take charge of the data entry for our trial. Before the entry, all the  
688 research assistants will accept the related training according to the data entry handbook.  
689 Researchers will inspect the database, and then sign electrically to let the data go in to  
690 effect.

### 691 **7.3 Data Verification and Problems Solving**

692 Researchers will verify the data through Data Verification Plan (DVP) approved by the  
693 data administrator and the statisticians. Data queries will be inputted to a data query  
694 database, and form the DCF. After being inspected, the DCF will then be handed back to  
695 the original site, and the researchers of the site should answer the queries. Any revision of  
696 the database will be recorded through the RDC software.

### 697 **7.4 Medical Coding**

698 A data administrator who has the medicine background will take charge of the medical  
699 coding. The contents of the coding are the clinical history, adverse events, and combined  
700 medication. The clinical history and adverse events will be coded through MedDRA  
701 dictionary (Version 13.0), and the combined medication will be coded via WHO DD  
702 dictionary (Version 2007.03). The lead researchers will verify the coded e-files.

### 703 **7.5 Data Report**

704 Data report contains the aspects as followed: (1) members of the project; (2)  
705 disagreement from the primary data management plan; (3) actual finish time of every  
706 project; (4) problems and the solution during the data management (if have any); (5)  
707 reconstruction of the database (if have any); (6) distribution of the participants; (7)  
708 participants who disobey the trial protocol; (7) classifying plan of the statistical analysis  
709 population.

710 Data report will be performed monthly since the first entry of the eCRF.

## 711 **7.6 Data Auditing**

712 When the data checking is finished, a data auditing and blinding review meeting will be  
713 hold. On the meeting, the data administrators, statisticians, researchers, clinical inspectors,  
714 and other related members would have a discussion on the following items according to  
715 the data management report and the data lists:

- 716 • Distribution of the participants;
- 717 • Protocol disobeying or not;
- 718 • Possible outlier;
- 719 • Baseline data;
- 720 • Outcomes;
- 721 • Statistical analysis plan.

## 722 **7.7 Database Locking**

723 The database will be locked if it fulfills all the aspects as followed: All the queries have  
724 been solved, and the database has been updated; No query has been found through the  
725 data inspection; The medical coding has been completed; The plan of the participants '  
726 classification has been approved; The final draft of the SAP has been made, and approved  
727 by the project leader.

728 The statisticians and the data administrators will signed the data locking form, and then  
729 the database will be locked. The locked database will be sent to the statisticians for  
730 further statistical analysis through the data format of SAS.

## 731 **8. Statistical Consideration**

732 The following is an overview of the statistical considerations. Details of the pre-specified  
733 statistical analyses can be found in the Statistical Analysis Plan (SAP).

734

735 **8.1 Statistical Analysis**

736 The primary study hypothesis is that EA is more effective than SA in the treatment of  
737 OIC in patients with cancer. The primary outcome is the proportion of overall responders,  
738 defined as a patient that has  $\geq 3$  SBMs/wk and  $\geq$  increase of 1 SBM from baseline  
739 simultaneously for at least 6 out of 8 weeks of the treatment period. The primary analysis  
740 will be intention-to-treat, which is defined as all randomized participants.

741 The following secondary outcomes will be analyzed using the t test, repeated measures  
742 analysis, Wilcoxon rank-sum test, Chi-square test or Fisher's exact test, as appropriate:

743 A two-side test with  $p < 0.05$  will be considered significant for all analyses.

744 **8.2 Statistical Analysis Plan (SAP)**

745 Prior to database lock and before code breaking, a final version of the SAP shall be issued  
746 and approved by the study statistician, and the principal investigator. The SAP will define  
747 all "pre-specified, planned analyses" and provide the general specifications for the  
748 analysis of the data to be collected and presented in the Clinical Study Report.

749 **9 Ethical principle**

750 For every study site, only when the trial protocol is approved by the IRB, the enrollment  
751 of participant will begin, but all should be after May 1, 2019.

752 **10 Funding**

753 This study was supported and funded by the 2019 National Administration of Traditional  
754 Chinese Medicine "Project of building evidence-based practice capacity for  
755 TCM--Project BEBPC-TCM" (NO. 2019XZZX-ZJ) by China Academy of Chinese  
756 Medical Sciences.

757

758

759 **11 References**

- 760 1. Caraceni A, Hanks G, Kaasa S, et al: Use of opioid analgesics in the treatment of  
761 cancer pain: Evidence-based recommendations from the EAPC. *Lancet Oncol*  
762 2012;13(2):e58-68.
- 763 2. Mercadante S. Intravenous morphine for management of cancer pain. *Lancet Oncol*  
764 2010;11(5):484-9.
- 765 3. World Health Organization. Cancer Pain Relief With A Guide To Opioid  
766 Availability. 2nd ed. Geneva, Switzerland: World Health Organization; 1996.
- 767 4. Cherny NI. The pharmacological management of cancer pain. *Eur J Cancer* 2001;37  
768 Suppl 7:S265-78.
- 769 5. Luo M, Li L, Lu CZ, et al. Clinical efficacy and safety of lactulose for minimal  
770 hepatic encephalopathy: a meta-analysis. *Eur J Gastroenterol Hepatol* 2011; 23:  
771 1250–7.
- 772 6. Kessler ER, Shah M, Gruschkus SK, et al. Cost and quality implications of  
773 opioid-based postsurgical pain control using administrative claims data from a large  
774 health system: opioid- related adverse events and their impact on clinical and  
775 economic outcomes. *Pharmacotherapy* 2013; 33(4):383–91.
- 776 7. Oderda GM, Said Q, Evans RS, et al. Opioid-related adverse drug events in surgical  
777 hospitalizations: impact on costs and length of stay. *Ann Pharmacother*  
778 2007;41(3):400–407.
- 779 8. Poulsen JL, Brock C, Olesen AE, et al. Evolving paradigms in the treatment of  
780 opioid-induced bowel dysfunction. *Therap Adv Gastroenterol* 2015; 8(6):360-72.
- 781 9. Bell TJ, Panchal SJ, Miaskowski C, et al. The prevalence, severity, and impact of  
782 opioid-induced bowel dysfunction: results of a US and European Patient Survey  
783 (PROBE 1). *Pain Med* 2009;10(1):35-42.
- 784 10. Mearin F, Lacy BE, Chang L, et al. Bowel disorders. *Gastroenterology* 2016; 150(6):  
785 1393–407.
- 786 11. Kalso E, Edwards JE, Moore RA, et al. Opioids in chronic non-cancer pain:  
787 systematic review of efficacy and safety. *Pain* 2004;112(3):372–80.
- 788 12. Sykes NP. The relationship between opioid use and laxative use in terminally ill



- 789 cancer patients. *Palliat Med* 1998;12(5):375–82.
- 790 13. Morlion B, Clemens KE, Dunlop W. Quality of life and healthcare resource in  
791 patients receiving opioids for chronic pain: A review of the place of  
792 oxycodone/naloxone. *Clin Drug Investig* 2015;35(1):1-11.
- 793 14. Lazzari M, Greco MT, Marcassa C, *et al.* Efficacy and tolerability of oral oxycodone  
794 and oxycodone/ naloxone combination in opioid-naïve cancer patients: A propensity  
795 analysis. *Drug Des Devel Ther* 2015; 9: 5863-72.
- 796 15. Camilleri M. Opioid-induced constipation: Challenges and therapeutic opportunities.  
797 *Am J Gastroenterol* 2011;106(5):835-42.
- 798 16. Rauck R, Slatkin NE, Stambler N, *et al.* Randomized, Double-Blind Trial of Oral  
799 Methylnaltrexone for the Treatment of Opioid-Induced Constipation in Patients with  
800 Chronic Noncancer Pain. *Pain Practice. Pain Pract* 2017;17(6):820-28.
- 801 17. Alame AM, Bahna H. Evaluation of constipation. *Clin Colon Rectal Surg* 2012;  
802 25(1):5–11.
- 803 18. Drewes AM, Munkholm P, Simrén M, *et al.* Definition, diagnosis and treatment  
804 strategies for opioid-induced bowel dysfunction—Recommendations of the Nordic  
805 Working Group. *Scand J Pain* 2016;11:111-22.
- 806 19. Muller-Lissner S, Bassotti G, Coffin B, *et al.* Opioid-induced constipation and bowel  
807 dysfunction: a clinical guideline. *Pain Med* 2016; 18(10): 1837–63.
- 808 20. Farmer AD, Holt CB, Downes TJ, *et al.* Pathophysiology, diagnosis, and management  
809 of opioid-induced constipation. *Lancet Gastroenterol Hepatol* 2018;3(3):203-12.
- 810 21. Slatkin N, Thomas J, Lipman AG, *et al.* Methylnaltrexone for treatment of  
811 opioid-induced constipation in advanced illness patients. *J Support Oncol* 2009; 7(1):  
812 39–46.
- 813 22. Zhou SL, Zhang XL, Wang JH. Comparison of electroacupuncture and medical  
814 treatment for functional constipation: a systematic review and meta-analysis.  
815 *Acupunct Med* 2017;35(5):324-31.\_
- 816 23. Zhang T, Chon TY, Liu B, *et al.* Efficacy of acupuncture for chronic constipation: a  
817 systematic review. *Am J Chin Med* 2013;41(4):717-42.
- 818 24. Liu Z, Yan S, Wu J, *et al.* Acupuncture for Chronic Severe Functional Constipation:  
819 A Randomized Trial. *Ann Intern Med* 2016;165(11):761-69.

- 820 25. Liu B, Wu J, Yan S, et al. Electroacupuncture vs Prucalopride for Severe Chronic  
821 Constipation: A Multicenter, Randomized, Controlled, Noninferiority Trial. *Am J*  
822 *Gastroenterol*. 2021;116(5):1024-1035.
- 823 26. Takahashi T. Mechanism of acupuncture on neuromodulation in the gut—a review.  
824 *Neuromodulation*. 2011;14:8-12; discussion 12
- 825 27. Oken MM, Creech RH, Tormey DC, et al. Toxicity and response criteria of the  
826 Eastern Cooperative Oncology Group. *Am J Clin Oncol* 1982;5(5): 649-55.
- 827 28. Lewis SJ, Heaton KW. Stool form scale as a useful guide to intestinal transit time.  
828 *Scand J Gastroenterol* 1997;32(9):920-4.
- 829 29. Katakami N, Oda K, Tauchi K, et al. Phase IIb, Randomized, Double-Blind,  
830 Placebo-Controlled Study of Naldemedine for the Treatment of Opioid-Induced  
831 Constipation in Patients With Cancer. *J Clin Oncol*. 2017;35(17):1921-8.
- 832 30. Song Yulei, Lin Zheng, Lin Lin, et al. Validation of the Chinese version of  
833 PAC-SYM questionnaire. *Journal of Nursing Science* 2012;27(7):73-6.
- 834 31. Marquis P, De La Loge C, Dubois D, et al. Development and validation of the Patient  
835 Assessment of Constipation Quality of Life questionnaire. *Scand J Gastroenterol*  
836 2005;40(5): 540-51.
- 837 32. Xun Jin, Yi-Jiang Ding, Shu-Qing Ding, et al. Evaluation of the Chinese version of  
838 the Patient Assessment of Constipation Quality of Life scale. *World Chinese Journal*  
839 *of Digestology* 2011, 19(2): 209-13.
- 840 33. Preston CC, Colman AM. Optimal number of response categories in rating scales:  
841 reliability, validity, discriminating power, and respondent preferences. *Acta Psychol*.  
842 2000;104(1):1–15.
- 843 34. Standardization Administration of the People’s Republic of China. GB/  
844 T12346-2006, Nomenclature and Location of Acupuncture Points [S].2006.

845

846 **12 Major update of the published protocol**847 **Important Changes Made to Study Design After Trial Commencement**

| No. | Item               | Original version                                                                                                                                                                                                                    | Final version                                                                                                                                                                                            | Reason(s) for making change(s)                              |
|-----|--------------------|-------------------------------------------------------------------------------------------------------------------------------------------------------------------------------------------------------------------------------------|----------------------------------------------------------------------------------------------------------------------------------------------------------------------------------------------------------|-------------------------------------------------------------|
| 1   | Exclusion criteria | (1)Patients diagnosed with clinically significant abnormal defecation due to functional disorders or structural abnormalities of the gastrointestinal tract and other tissues related to gastrointestinal tract (not including OIC) | Patients diagnosed with clinically significant abnormal defecation due to structural abnormalities of the gastrointestinal tract and other tissues related to gastrointestinal tract (not including OIC) | To reconsider the appropriate exclusion for more enrollment |
| 2   | Exclusion criteria | (13)Patients that received an opioid receptor antagonist or agonist within one month of the screening, or those who are scheduled to receive such therapy during the study                                                          | Patients that received an opioid receptor antagonist one month before the screening, or those who are scheduled to receive such therapy during the study                                                 | To reconsider the appropriate exclusion for more enrollment |
| 3   | Primary outcome    | The primary outcome will be the proportion of responders, ...                                                                                                                                                                       | The primary outcome will be the proportion of <b>overall</b> responders, ...                                                                                                                             | To make this point more clearly                             |

848

849 **Effects of Electroacupuncture on Opioid-induced**  
850 **Constipation in Patients with Cancer: A Randomized**  
851 **Controlled Trial**

852

853

854

855

856

857

858

859

*Statistical Analysis Plan*  
(Final 1.1)

860

861

862

863

864

865

866

867

868

869

870

871

872

873

874

875

876

877

878

Dongzhimen Hospital, Beijing University of Chinese Medicine

879

10 December, 2021

880

## CONTENTS

881

|     |                                                      |   |
|-----|------------------------------------------------------|---|
| 882 | 1. Introduction.....                                 | 2 |
| 883 | 2. Study objective.....                              | 3 |
| 884 | 3. Design .....                                      | 3 |
| 885 | 4. Statistical Considerations .....                  | 3 |
| 886 | 4.1 Study Hypothesis.....                            | 3 |
| 887 | 4.2 Statistical Hypothesis.....                      | 3 |
| 888 | 4.3 Study Populations .....                          | 3 |
| 889 | 4.4 Statistical Analyses.....                        | 3 |
| 890 | 4.4.1 The General Principle .....                    | 3 |
| 891 | 4.4.2 Demographics and Baseline Characteristics..... | 4 |
| 892 | 4.4.3 Analyses for Primary Outcome.....              | 4 |
| 893 | 4.4.4 Analyses for Secondary Outcome.....            | 4 |
| 894 | 4.4.5 Safety Analyses.....                           | 5 |
| 895 | 5. The Summary of Changes of Final SAP .....         | 6 |

896

897 **1. Introduction**

898 About 70-80% of patients experience moderate to severe pain. As the cornerstone of  
899 treatment for moderate to severe cancer pain, opiate analgesics, such as morphine and  
900 oxycodone, are recommended by WHO Cancer Pain Relief Guidelines. The use of  
901 systemic opioids is recommended by some studies for cancer patients experiencing  
902 moderate to severe pain, regardless of the underlying causes. Opioids stimulate receptors  
903 both in the central nervous system (CNS) and the peripheral nervous system, reducing  
904 pain and improving quality of life for patients. The drug can, however, be associated with  
905 serious adverse events (AEs) with a rate ranging from 1.8% to 13.6%, the most common  
906 of which is opioid-induced constipation (OIC). OIC represents a change in baseline  
907 bowel habits or defecation patterns that occurs following the administration or  
908 modification of opioid therapy. Approximately 41% of non-cancer patients and 94% of  
909 cancer patients who use opioids for pain have this condition. Symptoms of OIC are  
910 usually persistent and difficult to tolerate, which adversely affects patients' quality of life  
911 and results in reductions in dose or discontinuation of opioid analgesics. OIC is the result  
912 of multiple factors contributing to it: Opioids may activate  $\mu$ -receptors throughout the  
913 gastrointestinal tract and cause changes to gut motility, decreases in gut secretion, and an  
914 increase in sphincter tone, which can lead to constipation. Various pharmacological and  
915 nonpharmacological interventions are used to manage OIC, such as laxatives and  
916 increased fluid intake. However, these interventions are limited in effectiveness, and they  
917 do not address the pathophysiological mechanisms of OIC. However, longer-term  
918 efficacy and safety of PAMORAs are unclear, and they haven't been approved in China  
919 yet. Clinical trials are still underway to test these drugs. Additionally, PAMORAs are  
920 often associated with AEs such as abdominal pain and flatulence. As a result, it is still  
921 necessary to explore new treatment approaches for OIC.

922 Acupuncture has been used to treat gastrointestinal disease, including constipation,  
923 for thousands of years. According to two systematic reviews, acupuncture can improve  
924 spontaneous bowel movements (SBMs) in functional constipation. Additionally, the  
925 results of our study indicated that electroacupuncture (EA) could increase complete  
926 spontaneous bowel movements (CSBMs) and SBMs, with a long-term effect that  
927 continues for 24 weeks after treatment ceased among patients with chronic, severe

928 functional constipation. Through stimulation of the somatic and peripheral nervous  
929 systems, acupuncture can facilitate the gut motility and improve gastrointestinal function.  
930 The effectiveness of acupuncture for OIC is currently lacking evidence.

931

## 932 **2. Study objective**

933 The objective of this study is to assess the efficacy of EA for OIC in adult patients  
934 with cancer pain.

## 935 **3. Design**

936 This is a multicenter, sham-controlled, assessor-blinded, randomized trial.

## 937 **4. Statistical Considerations**

### 938 **4.1 Study Hypothesis**

939 The primary study hypothesis is that EA is more effective than SA in patients with  
940 cancer pain.

### 941 **4.2 Statistical Hypothesis**

942 The null hypothesis is that the proportion of overall responders will be the same for  
943 EA and SA, and the alternative hypothesis is that the change would differ.

### 944 **4.3 Study Populations**

945 All patients with randomization will be included in the analysis set regardless of  
946 whether they receive any treatment. According to the intention-to-treat principle, all  
947 analysis will be based on the randomization set.

### 948 **4.4 Statistical Analyses**

#### 949 **4.4.1 The General Principle**

950 Summary tables (descriptive statistics and/or frequency tables) will be provided for  
951 all variables at different endpoints. For continuous variables, means and standard  
952 deviations will be presented, unless the variable has a skewed distribution, in which case  
953 medians, 25th and 75th percentiles will be presented. For categorical variables, the  
954 number and percentage of participants within each category will be presented. For each  
955 variable (continuous or categorical), the number of missing values will be reported.

956

#### 957 **Statistical Comparisons Between Groups**

958 Continuous variables will be compared using a two-sample *t*-test or Wilcoxon  
959 rank-sum test if data show serious deviations from a normal distribution. Categorical data  
960 or ordinal data will be compared using a Wilcoxon rank-sum test, chi-square test or  
961 Fisher’s exact test, as appropriate. All tests will be two-sided.

962 For the analysis of the primary and secondary outcomes, estimated treatment  
963 differences and associated 95% two-sided confidence intervals will be presented.

964

#### 965 **Analysis Software**

966 For all statistical analyses, SAS 9.4 software will be used. All hypothesis testing will  
967 be carried out at the 5% (2-sided) significance level.

#### 968 **4.4.2 Demographics and Baseline Characteristics**

969 All data recorded at baseline will be summarized by group. Comparisons between  
970 groups will be performed using the methodology described in section 4.4.1. Summaries  
971 will be presented for the ITT Set in both groups.

#### 972 **4.4.3 Analyses for Primary Outcome**

973 The primary outcome will use a generalized linear model with a binomial  
974 distribution and identity link. The subgroup analysis will be conducted by adding an  
975 interaction between the baseline daily opioid dose and treatment into the generalized  
976 linear model.

977 Missing data on the primary outcome will be imputed using the multiple imputation  
978 method under the missing at random assumption.

#### 979 **4.4.4 Analyses for Secondary Outcomes**

980 Efficacy analyses for all secondary outcomes will be performed in the ITT  
981 population, without imputation of missing data.

982 Continuous data will be described with the average, standard deviation, median,  
983 minimum value, and maximum value, whereas categorical data will be represented by  
984 percentages as appropriate.



985 **4.4.5 Safety Analyses**

986 All adverse events and serious adverse events will be listed. Adverse events include  
987 the acupuncture-related adverse events and other adverse events.

988

989

990 **5. The Summary of Changes of Final SAP**

991 As compared to the original protocol published in the *Front. Med.* (Zhishun Liu,  
992 Yang Wang, Huanfang Xu, et al. Effects of Electroacupuncture on Opioid-Induced  
993 Constipation in Patients with Cancer: Study Protocol for a Multicenter Randomized  
994 Controlled Trial. *Front Med.* 2022), the present finalized SAP had made a few  
995 amendments. The major updates were provided in Table 1.

996

997 **Table 1. MAJOR UPDATES OF THE ORIGINAL SAP**

| No. | Item            | Original Version                                                                           | Final Version                                                                                                  |
|-----|-----------------|--------------------------------------------------------------------------------------------|----------------------------------------------------------------------------------------------------------------|
| 1   | Primary outcome | The primary outcome will be evaluated using the $\chi^2$ test.                             | The primary outcome will use a <b>generalized linear model</b> with a binomial distribution and identity link. |
| 2   | Safety outcome  | AE incidences for each treatment group will be compared using <b>Fisher's exact test</b> . | AE data will be provided for <b>descriptive purposes only</b> .                                                |

998

999

1  
2  
3  
4  
5  
6  
7  
8  
9  
10  
11  
12  
13  
14  
15  
16  
17  
18

## Ethical Approvals of all participating hospitals

This trial is to be conducted in 7 hospitals. The ethical review was firstly submitted to IRB of the principle organization, Guang'an men Hospital, and then to IRB of other participating hospitals. This trial has gained approval from all of the IRBs.

As both Wangjing Hospital and Guang'an men Hospital are affiliated to China Academy of Chinese Medical Sciences, Wangjing Hospital shared the same ethical approval as the Guang'an men Hospital.

Ethical approvals are attached in the following sequence.

1. Guang'an men Hospital Affiliated to China Academy of Chinese Medical Sciences
2. The First Affiliated Hospital of Guizhou University of Traditional Chinese Medicine
3. Zhejiang Hospital
4. Jiangsu Province Hospital of Traditional Chinese Medicine
5. Hengyang Hospital affiliated with Hunan University of Chinese Medicine
6. Yantai Hospital of Traditional Chinese Medicine

19  
20  
21  
22  
23

**Institutional Review Board Documentation of Guang'anmen Hospital of China Academy of  
Chinese Medical Sciences (EC\_AF\_054)**

**Ethical Approvals of Guang'anmen Hospital of China Academy of Chinese  
Medical Sciences**

|                       |                                                                                                                                                                                                                                                                                                                                                                                                                                                                                                                                                                                                                                                                                                                                                                                                                                                       |                     |                                                                               |
|-----------------------|-------------------------------------------------------------------------------------------------------------------------------------------------------------------------------------------------------------------------------------------------------------------------------------------------------------------------------------------------------------------------------------------------------------------------------------------------------------------------------------------------------------------------------------------------------------------------------------------------------------------------------------------------------------------------------------------------------------------------------------------------------------------------------------------------------------------------------------------------------|---------------------|-------------------------------------------------------------------------------|
| Trial name            | Effect of acupuncture for opioid-induced constipation in patients with cancer: a randomized controlled trial                                                                                                                                                                                                                                                                                                                                                                                                                                                                                                                                                                                                                                                                                                                                          |                     |                                                                               |
| Approval No.          | 2018-164-KY-01                                                                                                                                                                                                                                                                                                                                                                                                                                                                                                                                                                                                                                                                                                                                                                                                                                        | Project Sponsor     | Investigator                                                                  |
| Participating Centers | Guang'an men Hospital Affiliated to China Academy of Chinese Medical Sciences, The First Affiliated Hospital of Guizhou University of Traditional Chinese Medicine, Zhejiang Hospital, Jiangsu Province Hospital of Traditional Chinese Medicine, Hengyang Hospital affiliated with Hunan University of Chinese Medicine, Wangjing Hospital affiliated to China Academy of Chinese Medical Sciences, Yantai Hospital of Traditional Chinese Medicine                                                                                                                                                                                                                                                                                                                                                                                                  |                     |                                                                               |
| Site PI               | Zhishun Liu                                                                                                                                                                                                                                                                                                                                                                                                                                                                                                                                                                                                                                                                                                                                                                                                                                           | Research department | Acupuncture and Moxibustion Department                                        |
| Review Attribute      | Second review                                                                                                                                                                                                                                                                                                                                                                                                                                                                                                                                                                                                                                                                                                                                                                                                                                         | Review methods      | Quick Review                                                                  |
| Review Date           | December 20, 2018                                                                                                                                                                                                                                                                                                                                                                                                                                                                                                                                                                                                                                                                                                                                                                                                                                     | Review Place        | Guang'an men Hospital Affiliated to China Academy of Chinese Medical Sciences |
| Committee Member      | Haibo Yin, Wei Cao                                                                                                                                                                                                                                                                                                                                                                                                                                                                                                                                                                                                                                                                                                                                                                                                                                    |                     |                                                                               |
| Approval Files        | Study Protocol ( VERSION1.0_ 2018093001/September 30, 2018 ) , Case Report Form(VERSION1.0_ 2018093001/September 30, 2018) Informed Consent ( VERSION1.0_ 2018093001/September 30, 2018 ) , Participant recruitment advertisement (VERSION1.0_ 2018093001/September 30, 2018), Diary card in screening period (VERSION1.0_ 2018093001/September 30, 2018), Diary card in treatment period (VERSION1.0_ 2018093001/September 30, 2018), Diary card in follow-up period (VERSION1.0_ 2018093001/September 30, 2018), Investigator's Brochure(VERSION1.0_ 2018093001/September 30, 2018), Emergency plan(VERSION1.0_ 2018093001/September 30, 2018).                                                                                                                                                                                                     |                     |                                                                               |
| Review Comments       | According to "ethical review methods for biomedical study involving human subjects" issued by the Ministry of Health, "Good Clinical Practice", "Provisions for Clinical Trials of Medical Device" and "Guidelines for Ethical Review Work of Drug Clinical Trials" issued by State Food and Drug Administration (SFDA) of the People's Republic of China, "management specifications for ethical review of TCM clinical studies" issued by State Administration of Traditional Chinese Medicine, "Declaration of Helsinki", and "International ethical guidelines for biomedical research involving human subjects" issued by Council for International Organizations of Medical Sciences, this clinical research was reviewed by the institutional review board (IRB) of Guang'anmen Hospital of China Academy of Chinese Medical Sciences. And the |                     |                                                                               |

|                                                                                 |                                                                                                                                                                                                                                                                                                                                                                                                                                                                                                                                                                                                                                                                                                                                                                                                                                                                                                                                                                                                                                                                                                                                                                                                                                                                                                                                                                                                                                                                                                                                                                                                                                                                                                                                                                                                                                                                                                                                                                                                                                                                |                      |                   |
|---------------------------------------------------------------------------------|----------------------------------------------------------------------------------------------------------------------------------------------------------------------------------------------------------------------------------------------------------------------------------------------------------------------------------------------------------------------------------------------------------------------------------------------------------------------------------------------------------------------------------------------------------------------------------------------------------------------------------------------------------------------------------------------------------------------------------------------------------------------------------------------------------------------------------------------------------------------------------------------------------------------------------------------------------------------------------------------------------------------------------------------------------------------------------------------------------------------------------------------------------------------------------------------------------------------------------------------------------------------------------------------------------------------------------------------------------------------------------------------------------------------------------------------------------------------------------------------------------------------------------------------------------------------------------------------------------------------------------------------------------------------------------------------------------------------------------------------------------------------------------------------------------------------------------------------------------------------------------------------------------------------------------------------------------------------------------------------------------------------------------------------------------------|----------------------|-------------------|
|                                                                                 | <p>study protocol, informed consent, and the recruitment files of this research were approved.</p> <p>Please conduct this clinical study following the GCP principles and the study protocol approved by the IRB. The health and rights of the subjects should be protected throughout the whole study.</p> <p>This approval will be invalid if the trial could not be initiated within three years, and the application should be resubmitted.</p> <p>An application should be submitted if a change of the principle investigator (PI), or any modification of the study protocol, informed consent, or the recruitment files are made.</p> <p>A report of the severe adverse events (SAE) should be submitted within 15 working days if any SAE or any other un-anticipated AE, which will affect the risk-reward ratio of this study, occurs. If a fatal adverse event occurs, please submit a serious adverse event report as soon as it becomes known.</p> <p>Researchers should submit report of the study progress one month before the deadline according to ethical review frequency. A summary report of the study progress of each site should be submitted by the site PI to the IRB of the leading site. In any condition which will greatly affect the progress of the study or increase the potential risk of the subjects, a written report should be submitted by the site PI to the IRB.</p> <p>A protocol deviation report should be submitted by the site PI/monitor/researcher if any of the following occurs: conditions that violate the study protocol: subjects who did not meet the inclusion criteria, or should be excluded according to the exclusion criteria, were wrongly included in the study; incorrect treatment or dose was given; prohibited combined medicine was used; conditions that violate GCP principle: subjects' rights and health are badly affected; the science of study was badly affected.</p> <p>A final report should be submitted when the study is finished completely or terminated prematurely.</p> |                      |                   |
| Validity Period                                                                 | From December 25,2018 to December 24, 2019                                                                                                                                                                                                                                                                                                                                                                                                                                                                                                                                                                                                                                                                                                                                                                                                                                                                                                                                                                                                                                                                                                                                                                                                                                                                                                                                                                                                                                                                                                                                                                                                                                                                                                                                                                                                                                                                                                                                                                                                                     |                      |                   |
| Tracking review frequency                                                       | 12 months                                                                                                                                                                                                                                                                                                                                                                                                                                                                                                                                                                                                                                                                                                                                                                                                                                                                                                                                                                                                                                                                                                                                                                                                                                                                                                                                                                                                                                                                                                                                                                                                                                                                                                                                                                                                                                                                                                                                                                                                                                                      | Tracking review date | December 24, 2019 |
| Contact                                                                         | Jie Qiao, +86 010-88001552, E-mail: gamhec@126.com                                                                                                                                                                                                                                                                                                                                                                                                                                                                                                                                                                                                                                                                                                                                                                                                                                                                                                                                                                                                                                                                                                                                                                                                                                                                                                                                                                                                                                                                                                                                                                                                                                                                                                                                                                                                                                                                                                                                                                                                             |                      |                   |
| Director Signature                                                              | Haibo Yin                                                                                                                                                                                                                                                                                                                                                                                                                                                                                                                                                                                                                                                                                                                                                                                                                                                                                                                                                                                                                                                                                                                                                                                                                                                                                                                                                                                                                                                                                                                                                                                                                                                                                                                                                                                                                                                                                                                                                                                                                                                      |                      |                   |
| IRB of Guang'anmen Hospital of China Academy of Chinese Medical Sciences (Seal) |                                                                                                                                                                                                                                                                                                                                                                                                                                                                                                                                                                                                                                                                                                                                                                                                                                                                                                                                                                                                                                                                                                                                                                                                                                                                                                                                                                                                                                                                                                                                                                                                                                                                                                                                                                                                                                                                                                                                                                                                                                                                |                      |                   |
| Date: December 24, 2018                                                         |                                                                                                                                                                                                                                                                                                                                                                                                                                                                                                                                                                                                                                                                                                                                                                                                                                                                                                                                                                                                                                                                                                                                                                                                                                                                                                                                                                                                                                                                                                                                                                                                                                                                                                                                                                                                                                                                                                                                                                                                                                                                |                      |                   |

Version No.03.05 / Version Date: 20170824

24  
25  
26  
27  
28  
29  
30  
31  
32  
33

34  
35  
36

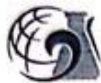

## 伦理审查批件

|         |                                                                                                                                                                                                                                                                                                                                                                                                                                                                                                                                                                                                                                                       |      |              |
|---------|-------------------------------------------------------------------------------------------------------------------------------------------------------------------------------------------------------------------------------------------------------------------------------------------------------------------------------------------------------------------------------------------------------------------------------------------------------------------------------------------------------------------------------------------------------------------------------------------------------------------------------------------------------|------|--------------|
| 项目名称    | 电针缓解癌痛阿片类药物性便秘--随机对照试验                                                                                                                                                                                                                                                                                                                                                                                                                                                                                                                                                                                                                                |      |              |
| 批件号     | 2018-164-KY-01                                                                                                                                                                                                                                                                                                                                                                                                                                                                                                                                                                                                                                        | 项目来源 | 研究者          |
| 研究单位    | 中国中医科学院广安门医院                                                                                                                                                                                                                                                                                                                                                                                                                                                                                                                                                                                                                                          |      |              |
| 申办者     | 无                                                                                                                                                                                                                                                                                                                                                                                                                                                                                                                                                                                                                                                     |      |              |
| 主要研究者   | 刘志顺                                                                                                                                                                                                                                                                                                                                                                                                                                                                                                                                                                                                                                                   | 研究科室 | 针灸科          |
| 审查类别    | 复审                                                                                                                                                                                                                                                                                                                                                                                                                                                                                                                                                                                                                                                    | 审查方式 | 快速审查         |
| 审查日期    | 2018-12-20                                                                                                                                                                                                                                                                                                                                                                                                                                                                                                                                                                                                                                            | 审查地点 | 中国中医科学院广安门医院 |
| 审查委员    | 殷海波, 曹炜                                                                                                                                                                                                                                                                                                                                                                                                                                                                                                                                                                                                                                               |      |              |
| 批准文件及版本 | <ol style="list-style-type: none"> <li>1. 研究方案 (版本号: 2018093001; 版本日期: 2018-09-30)</li> <li>2. 病例报告表 (版本号: VERSION 1.0_20180930; 版本日期: 2018-09-30)</li> <li>3. 知情同意书 (版本号: 2018113001; 版本日期: 2018-11-30)</li> <li>4. 招募广告 (版本号: 20180930; 版本日期: 2018-09-30)</li> <li>5. 日记卡-筛选期 (版本号: VERSION 1.0_20180930; 版本日期: 2018-09-30)</li> <li>6. 日记卡-治疗期 (版本号: VERSION 1.0_20180930; 版本日期: 2018-09-30)</li> <li>7. 日记卡-随访期 (版本号: VERSION 1.0_20180930; 版本日期: 2018-09-30)</li> <li>8. 研究者手册 (版本号: 2018093001; 版本日期: 2018-9-30)</li> <li>9. 应急预案 (版本号: 2018113001; 版本日期: 2018-11-30)</li> </ol>                                                                |      |              |
| 审查意见    | <p>根据国家卫生计生委《涉及人的生物医学研究伦理审查办法》、国家药品监督管理局《药物临床试验质量管理规范》、《医疗器械临床试验规定》、《药物临床试验伦理审查工作指导原则》国家中医药管理局《中医药临床研究伦理审查管理规范》以及《赫尔辛基宣言》和国际医学科学组织委员会颁布的《人体生物医学研究国际道德指南》的伦理原则, 经本伦理委员会审查, 同意按所批准的临床研究方案、知情同意书、招募材料开展本研究。</p> <p>请遵循 GCP 原则、遵循伦理委员会批准的方案开展临床研究, 保护受试者的健康与权利。</p> <p>若在三年内未启动研究, 本批件作废, 需重新提交伦理审查申请。</p> <p>研究过程中若变更主要研究者, 对临床研究方案、知情同意书、招募材料等的任何修改, 请申请人提交修正案审查申请。</p> <p>如发生严重不良事件以及影响研究风险受益比的非预期不良事件, 请申请人在获知后 15 个工作日内提交严重不良事件报告, 如果是致死的不良反应, 请在获知后立即提交严重不良事件报告。</p> <p>请按照伦理委员会规定的年度/定期跟踪审查频率, 申请人在截止日期前 1 个月提交研究进展报告; 申办者应当向组长单位伦理委员会提交各中心研究进展的汇总报告; 当出现任何可能显著影响试验进行或增加受试者危险的情况时, 请申请人及时向伦理委员会提交书面报告。</p> <p>研究纳入了不符合纳入标准或符合排除标准的受试者, 符合中止试验规</p> |      |              |

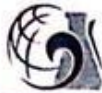

|                        |                                                                                                                                            |          |                  |
|------------------------|--------------------------------------------------------------------------------------------------------------------------------------------|----------|------------------|
|                        | 定而未让受试者退出研究，给予错误治疗或剂量，给予方案禁止的合并用药等没有遵从方案开展研究的情况；或可能对受试者的权益/健康以及研究的科学性造成不良影响等违背 GCP 原则的情况，请申办者/监查员/研究者提交违背方案报告。<br>提前终止或完成临床研究，请及时提交研究完成报告。 |          |                  |
| 批件有效期                  | 2018 年 12 月 25 日~2019 年 12 月 24 日                                                                                                          |          |                  |
| 跟踪审查频率                 | 12 个月                                                                                                                                      | 跟踪审查截止日期 | 2019 年 12 月 24 日 |
| 联系人与联系方式               | 联系人: 乔洁      联系电话: 010-88001552      Email: jiaojie@126.com                                                                                |          |                  |
| 主任委员/副主任委员签字           |                                                                                                                                            |          |                  |
| 中国中医科学院广安门医院伦理委员会 (盖章) |                                                                                                                                            |          |                  |
| 日期: 2018 年  伦理委员会      |                                                                                                                                            |          |                  |

38  
39  
40



41  
42

**Ethical Approvals of the First Affiliated Hospital of Guizhou University of  
Traditional Chinese Medicine**

|                  |                                                                                                                                                                                                                                                                                                                                                                                                                                                                                                                                                                                  |              |                                                                                                         |
|------------------|----------------------------------------------------------------------------------------------------------------------------------------------------------------------------------------------------------------------------------------------------------------------------------------------------------------------------------------------------------------------------------------------------------------------------------------------------------------------------------------------------------------------------------------------------------------------------------|--------------|---------------------------------------------------------------------------------------------------------|
| Approval No.     | H2019-001                                                                                                                                                                                                                                                                                                                                                                                                                                                                                                                                                                        |              |                                                                                                         |
| Trial name       | Effect of acupuncture for opioid-induced constipation in patients with cancer: a randomized controlled trial                                                                                                                                                                                                                                                                                                                                                                                                                                                                     |              |                                                                                                         |
| Project source   | Guang'an men Hospital Affiliated to China Academy of Chinese Medical Sciences                                                                                                                                                                                                                                                                                                                                                                                                                                                                                                    |              |                                                                                                         |
| Applicators      | Cunxia LU                                                                                                                                                                                                                                                                                                                                                                                                                                                                                                                                                                        |              |                                                                                                         |
| Review Date      | March 5, 2019                                                                                                                                                                                                                                                                                                                                                                                                                                                                                                                                                                    | Review Place | GCP meeting room in the First Affiliated Hospital of Guizhou University of Traditional Chinese Medicine |
| Approval Files   | Technical Service Contract, Ethical Approvals of Guang'anmen Hospital of China Academy of Chinese Medical Sciences                                                                                                                                                                                                                                                                                                                                                                                                                                                               |              |                                                                                                         |
| Review Comments  | <p>According to "ethical review methods for biomedical study involving human subjects(2016)" issued by the Ministry of Health, "Good Clinical Practice", "International ethical guidelines for biomedical research involving human subjects" issued by Council for International Organizations of Medical Sciences, and "Declaration of Helsinki", this research was approved after review by the ethics committee.</p> <p>Please conduct the study in accordance with the protocol approved by the ethics committee, and protect the health and rights of the participants.</p> |              |                                                                                                         |
| Ethics Committee | IRB of the First Affiliated Hospital of Guizhou University of Traditional Chinese Medicine<br>(Seal)                                                                                                                                                                                                                                                                                                                                                                                                                                                                             |              |                                                                                                         |
| Date             | March 5, 2019                                                                                                                                                                                                                                                                                                                                                                                                                                                                                                                                                                    |              |                                                                                                         |

43  
44  
45  
46  
47  
48

**贵阳中医学院第一附属医院伦理委员会  
伦理审查批件（科研）**

|           |                                                                                                                                          |      |                      |
|-----------|------------------------------------------------------------------------------------------------------------------------------------------|------|----------------------|
| 批件号       | H2019-001                                                                                                                                |      |                      |
| 项目名称      | 电针缓解癌痛阿片类药物性便秘—随机对照试验                                                                                                                    |      |                      |
| 项目来源      | 中国中医科学院广安门医院                                                                                                                             |      |                      |
| 申请人       | 卢春霞                                                                                                                                      |      |                      |
| 审查日期      | 2019.03.05                                                                                                                               | 审查地点 | 贵阳中医学院第一附属医院 GCP 会议室 |
| 审查文件      | 技术服务合同、北京总中心的伦理批件                                                                                                                        |      |                      |
| 审查意见:     | <p>根据卫计委《涉及人的生物医学研究伦理审查办法（2016）》、WMA《赫尔辛基宣言》和 CIOMS《人体生物医学研究国际道德指南》的伦理原则，经本伦理委员会审查，同意开展本项科学研究。</p> <p>请遵循伦理委员会批准的方案开展研究，保护受试者的健康与权力。</p> |      |                      |
| 伦理委员会（盖章） |                                                      |      |                      |
| 日期        | 2019.03.05                                                                                                                               |      |                      |

|                        |                                                                                                                                                                                                                                                                                                                                                                                                                                                                                                                                                                                                                                                                                                                                                                                                                                                                                                                                                                                      |                    |                                        |
|------------------------|--------------------------------------------------------------------------------------------------------------------------------------------------------------------------------------------------------------------------------------------------------------------------------------------------------------------------------------------------------------------------------------------------------------------------------------------------------------------------------------------------------------------------------------------------------------------------------------------------------------------------------------------------------------------------------------------------------------------------------------------------------------------------------------------------------------------------------------------------------------------------------------------------------------------------------------------------------------------------------------|--------------------|----------------------------------------|
| Study title            | Effect of acupuncture for opioid-induced constipation in patients with cancer: a randomized controlled trial                                                                                                                                                                                                                                                                                                                                                                                                                                                                                                                                                                                                                                                                                                                                                                                                                                                                         |                    |                                        |
| Sponsor                | Zhejiang Hospital                                                                                                                                                                                                                                                                                                                                                                                                                                                                                                                                                                                                                                                                                                                                                                                                                                                                                                                                                                    |                    |                                        |
| Principal investigator | Xiaoqing Jin, Jianfang Zhu                                                                                                                                                                                                                                                                                                                                                                                                                                                                                                                                                                                                                                                                                                                                                                                                                                                                                                                                                           | Specialty          | Acupuncture and moxibustion department |
| Category of review     | Initial review, second review                                                                                                                                                                                                                                                                                                                                                                                                                                                                                                                                                                                                                                                                                                                                                                                                                                                                                                                                                        | Type of review     | Meeting review, quick review           |
| Date of review         | 2019.2.22, 2019.2.28                                                                                                                                                                                                                                                                                                                                                                                                                                                                                                                                                                                                                                                                                                                                                                                                                                                                                                                                                                 | Location of review | Meeting room131 in No. 8 building      |
| Reviewed items         | <ol style="list-style-type: none"> <li>1. Application form for Initial Review of the study</li> <li>2. Study Protocol ( VERSION1.0_ 2018093001/September 30, 2018 )</li> <li>3. Supplementary Study Protocol of Zhejiang Hospital ( VERSION1.0, January 3, 2019 )</li> <li>4. Informed Consent ( VERSION2.1, February 27, 2019 )</li> <li>5. Participant recruitment advertisement ( VERSION1.0, January 3, 2019 )</li> <li>6. Emergency plan</li> <li>7. Case Report Form(VERSION1.0_ 2018093001/September 30, 2018)</li> <li>8. Diary card in screening period (VERSION1.0_ 2018093001/September 30, 2018)</li> <li>9. Diary card in treatment period (VERSION1.0_ 2018093001/September 30, 2018)</li> <li>10. Diary card in follow-up period (VERSION1.0_ 2018093001/September 30, 2018)</li> <li>11.The resume of principal investigator and certification of GCP</li> <li>12. Ethical Approvals of Guang'anmen Hospital of China Academy of Chinese Medical Sciences</li> </ol> |                    |                                        |
| Evaluation             | The ethics committee conducted a meeting review and rapid review of the above items, and believed that the investigator's qualification, clinical study plan, informed consent, recruitment advertisement and benefit and risk assessment were basically in compliant with the ethical requirements , and agreed to carry out the clinical study.                                                                                                                                                                                                                                                                                                                                                                                                                                                                                                                                                                                                                                    |                    |                                        |
| Decision               | The Committee's decision on the study protocol: Approval                                                                                                                                                                                                                                                                                                                                                                                                                                                                                                                                                                                                                                                                                                                                                                                                                                                                                                                             |                    |                                        |
| Continual review       | <p>Will be the study accept a follow-up review during the study by the Ethics committee? Yes</p> <p>The frequency of review will be once every 12 months from the date of approval of the study, please submit the research progress report one month before February 27, 2020.</p> <p>The ethics committee reserves the right to change the frequency of follow-up reviews based on actual progress.</p>                                                                                                                                                                                                                                                                                                                                                                                                                                                                                                                                                                            |                    |                                        |

- Notes:
1. Please follow the relevant laws and regulations of China, “ Standard for quality management of drug clinical trials(2003)” and “ Standard for quality management of clinical trials on medical devices(2016)” issued by China Food and Drug Administration (CFDA), Declaration of Helsinki”, and “International ethical guidelines for biomedical research involving human subjects” issued by Council for International Organizations of Medical Sciences, “ethical review methods for biomedical study involving human subjects(2016)” issued by the Ministry of Health.
  2. Please follow the clinical study protocol, informed consent and recruitment materials approved by the ETHICS Committee to conduct this study, and protect the health and rights of the participants. Any changes to the study protocol, informed consent and recruitment materials must be reviewed and approved by the ethics committee.
  3. Serious adverse events or unexpected adverse events occurring in Zhejiang hospital should be submitted to our ethics committee within 24 hours. Serious adverse events or unexpected adverse events occurring at other centers in China shall be periodically collected and submitted to the ethics committee. All unexpected adverse events occurring in the foreign branch centers shall also be periodically collected and submitted to the ethics committee, the ethics committee reserves the right to make a new decision on its assessment.
  4. Starting today, whether the trial has started or not, a progress report is required one month before the follow-up review is due. If the study is in progress, please submit the study progress report 2 months before the approval expires. The study can be continued only after the approval is reviewed and approved by the ethics committee.
  5. The investigator and sponsor shall submit a summary of the center's research progress report to the ethics committee of the leader site, and the applicant shall timely submit a written report to the ETHICS Committee in case of any situation that may affect the conduct of the study or increase the risk of subjects.
  6. A protocol deviation report should be submitted by the site investigator and sponsor if any of the following occurs: conditions that violate the study protocol: subjects who did not meet the inclusion criteria, or should be excluded according to the exclusion criteria, were wrongly included in the study; incorrect treatment or dose was given; prohibited combined medicine was used; conditions that violate GCP principle: subjects’ rights and health are badly affected; the science of study was badly affected.
  7. If the applicant suspends or terminates the clinical study in advance, please submit the suspension or termination report in time.
  8. A final report should be submitted when the study is finished completely or terminated prematurely.

|                    |                                                                                                                                                                                                                                                                                                                                                                                                                                                                       |
|--------------------|-----------------------------------------------------------------------------------------------------------------------------------------------------------------------------------------------------------------------------------------------------------------------------------------------------------------------------------------------------------------------------------------------------------------------------------------------------------------------|
| Chair signature    | He Xiaobo                                                                                                                                                                                                                                                                                                                                                                                                                                                             |
| Approval date      | 2019.2.28                                                                                                                                                                                                                                                                                                                                                                                                                                                             |
| Stamp of ZJEC      | Ethics Committee of Zhejiang Hospital(seal)                                                                                                                                                                                                                                                                                                                                                                                                                           |
| Period of validity | This approval is valid from February 28, 2019, to February 27, 2022. If it is not implemented within the time limit, it shall be abolished automatically                                                                                                                                                                                                                                                                                                              |
| Statement          | The responsibilities, personnel composition, operating procedures and records of the ethics committee have followed the ethical review principle of “Quality management standards for drug clinical trials(2003)”, “ Standard for quality management of clinical trials on medical devices(2016)” and ICH-GCP promulgated by the National Medical Products Administration of the People's Republic of China, and abide by the relevant laws and regulations of China. |

52 Address: No 12, Linyin road, Hangzhou, Zhejiang, China (310013), Contact: +86 0571-81595231, Contact person:  
53 WeiLi/Xiaoping Xie, E-mail: zjyykikli@163.com



## 浙江医院医学伦理委员会 临床试验审查批件

## Approval Letter of Medical Ethics Committee of Zhejiang Hospital

批件号 Approval NO.: 2019 临审第 (6K) 号

签发日期 Date of issue : 2019.02.28

|                                 |                                                                                                                                                                                                                                                                                                                                                                                                                                                                                                                                                               |                            |                      |
|---------------------------------|---------------------------------------------------------------------------------------------------------------------------------------------------------------------------------------------------------------------------------------------------------------------------------------------------------------------------------------------------------------------------------------------------------------------------------------------------------------------------------------------------------------------------------------------------------------|----------------------------|----------------------|
| 项目名称<br>Study Title             | 电针缓解癌痛阿片类药物性便秘——随机对照试验临床研究                                                                                                                                                                                                                                                                                                                                                                                                                                                                                                                                    |                            |                      |
| 申办方<br>Sponsor                  | 浙江医院                                                                                                                                                                                                                                                                                                                                                                                                                                                                                                                                                          |                            |                      |
| 主要研究者<br>Principal Investigator | 金肖青、诸剑芳                                                                                                                                                                                                                                                                                                                                                                                                                                                                                                                                                       | 承担专业<br>Specialty          | 针灸科                  |
| 审查类别<br>Category of Review      | 初始审查、复审                                                                                                                                                                                                                                                                                                                                                                                                                                                                                                                                                       | 审查方式<br>Type of Review     | 会议审查、快速审查            |
| 审查日期<br>Date of Review          | 2019.02.22、2019.02.28                                                                                                                                                                                                                                                                                                                                                                                                                                                                                                                                         | 审查地点<br>Location of Review | 8号楼 313 会议室<br>各自办公室 |
| 审查文件清单<br>Reviewed Items        | <ol style="list-style-type: none"> <li>1. 临床课题研究初始审查申请书</li> <li>2. 研究方案, 版本号: 2018093001, 日期: 2018.9.30</li> <li>3. 浙江医院补充临床研究方案, 1.0 版, 日期: 2019.01.03</li> <li>4. 知情同意书, 2.1 版, 日期: 2019.02.27</li> <li>5. 招募广告, 2.0 版, 日期: 2019.01.03</li> <li>6. 应急预案</li> <li>7. 病例报告表, 版本号: VERSION 1.0_20180930</li> <li>8. 患者日记卡 (筛选期), 版本号和日期: VERSION 1.0_20180930</li> <li>9. 患者日记卡 (随访期), 版本号和日期: VERSION 1.0_20180930</li> <li>10. 患者日记卡 (治疗期), 版本号和日期: VERSION 1.0_20180930</li> <li>11. 主要研究者履历及 GCP 证书</li> <li>12. 研究者责任声明</li> <li>13. 组长单位伦理批件</li> </ol> |                            |                      |
| 审评意见<br>Evaluation              | 本伦理委员会对上述资料进行了会议审查和快速审查, 认为研究者资质、临床研究方案、知情同意书、招募广告和受益与风险评估等基本符合伦理规范, 同意实施临床研究。                                                                                                                                                                                                                                                                                                                                                                                                                                                                                |                            |                      |
| 审查决定<br>Decision                | 委员会对该方案的审查决定为: <input checked="" type="checkbox"/> 同意 (Approval)                                                                                                                                                                                                                                                                                                                                                                                                                                                                                              |                            |                      |
| 年度/定期跟踪审查<br>Continual Review   | <p>该研究进行过程中将接受伦理委员会的跟踪审查? <input checked="" type="checkbox"/>是(Yes) <input type="checkbox"/>否(No)</p> <p>审查频率为该研究批准之日起每 12 个月一次, 首次, 请于 2020 年 02 月 27 日前 1 个月递交研究进展报告。</p> <p>伦理委员会有根据实际进展情况改变跟踪审查频率的权利。</p>                                                                                                                                                                                                                                                                                                                                                 |                            |                      |

地址: 杭州市灵隐路 12 号 邮编: 310013 电话: 0571-81595231 联系人: 李卫/谢小萍 邮箱: zjykyk@163.com

**备注:**

1. 请遵循我国相关法律、法规和规章 CFDA《药物临床试验质量管理规范（2003）》、《医疗器械临床试验质量管理规范（2016）》、WMA《赫尔辛基宣言》和 CIOMS《人体生物医学研究国际道德指南》和国家卫生健康委员会《涉及人的生物医学研究伦理审查办法（2016）》的伦理原则。
2. 请遵循经本伦理委员会批准的临床研究方案、知情同意书、招募材料开展本研究，保护受试者的健康与权利。对研究方案、知情同意书和招募材料等的任何修改，均须得到伦理委员会审查同意后方可实施。
3. 在浙江医院发生的严重不良事件或非预期不良事件应 24 小时内递交本医学伦理委员会，国内其他中心发生的严重不良事件或非预期不良事件需定期汇总后递交本伦理委员会，对于国外发生的非预期不良事件定期汇总后递交伦理委员会，伦理委员会有权对其评估做出新的决定。
4. 自今日起，无论试验开始与否，请在跟踪审查到期前 1 个月提交研究进展报告；若研究正在进行中，请在批件到期前 2 个月，递交研究进展报告，须得到伦理委员会审查同意延长批件有效期后方可继续进行。
5. 研究者和申办方应当向组长单位伦理委员会提交中心研究进展报告汇总；当出现任何可能显著影响试验进行或增加受试者危险的情况时，请申请人及时向伦理委员会提交书面报告。
6. 研究纳入了不符合纳入标准或符合排除标准的受试者，符合中止试验规定而未让受试者退出研究，给予错误治疗或剂量，给予方案禁止的合并用药等没有遵从方案开展研究的情况；或可能对受试者的权益或健康以及研究的科学性造成不良影响等违背 GCP 原则的情况，请研究者和申办者提交违背方案报告。
7. 申请人暂停或提前终止临床研究，请及时提交暂停或终止研究报告。
8. 完成临床研究，请申请人提交结题报告。

|                             |                                                                                                                  |
|-----------------------------|------------------------------------------------------------------------------------------------------------------|
| 主任签字<br>Chair Signature     |                              |
| 批准日期<br>Approval Date       | 2019.2.28                                                                                                        |
| 伦理委员会<br>Stamp of ZJEC      | 浙江医院医学伦理委员会（盖章）<br>          |
| 批件有效期<br>Period of Validity | 此批件的有效期为（2019.02.28-2022.02.27），逾期未实施的，自行废止。                                                                     |
| 声明<br>Statement             | 本伦理委员会的职责、人员组成、操作程序及记录遵循中华人民共和国药品监督管理局颁布的药物临床试验质量管理规范（2003）、医疗器械临床试验质量管理规范（2016）和 ICH-GCP 的伦理审查原则，并遵守中国的相关法律及法规。 |

### Approvals of Ethical Review

|                      |                                                                                                                                                                                                                                                                                                                                                                                                                                                                                                                                                                                                                                                                                                                                                                                                                                                                                                                                                                                                                                                                                                                                                                                                                                                                                                                                                                                                                                                                                                                                                                                                                                                                                                                                                                                                                                                                                                                                                                                                                                                                                                                                                                                                                                                       |                |              |
|----------------------|-------------------------------------------------------------------------------------------------------------------------------------------------------------------------------------------------------------------------------------------------------------------------------------------------------------------------------------------------------------------------------------------------------------------------------------------------------------------------------------------------------------------------------------------------------------------------------------------------------------------------------------------------------------------------------------------------------------------------------------------------------------------------------------------------------------------------------------------------------------------------------------------------------------------------------------------------------------------------------------------------------------------------------------------------------------------------------------------------------------------------------------------------------------------------------------------------------------------------------------------------------------------------------------------------------------------------------------------------------------------------------------------------------------------------------------------------------------------------------------------------------------------------------------------------------------------------------------------------------------------------------------------------------------------------------------------------------------------------------------------------------------------------------------------------------------------------------------------------------------------------------------------------------------------------------------------------------------------------------------------------------------------------------------------------------------------------------------------------------------------------------------------------------------------------------------------------------------------------------------------------------|----------------|--------------|
| Approval No.         | 2019NL-031-03                                                                                                                                                                                                                                                                                                                                                                                                                                                                                                                                                                                                                                                                                                                                                                                                                                                                                                                                                                                                                                                                                                                                                                                                                                                                                                                                                                                                                                                                                                                                                                                                                                                                                                                                                                                                                                                                                                                                                                                                                                                                                                                                                                                                                                         |                |              |
| Trial name           | Effect of acupuncture for opioid-induced constipation in patients with cancer: a randomized controlled trial                                                                                                                                                                                                                                                                                                                                                                                                                                                                                                                                                                                                                                                                                                                                                                                                                                                                                                                                                                                                                                                                                                                                                                                                                                                                                                                                                                                                                                                                                                                                                                                                                                                                                                                                                                                                                                                                                                                                                                                                                                                                                                                                          |                |              |
| Project source       | Guang'an men Hospital Affiliated to China Academy of Chinese Medical Sciences                                                                                                                                                                                                                                                                                                                                                                                                                                                                                                                                                                                                                                                                                                                                                                                                                                                                                                                                                                                                                                                                                                                                                                                                                                                                                                                                                                                                                                                                                                                                                                                                                                                                                                                                                                                                                                                                                                                                                                                                                                                                                                                                                                         |                |              |
| Participating Center | Jiangsu Province Hospital of Traditional Chinese Medicine                                                                                                                                                                                                                                                                                                                                                                                                                                                                                                                                                                                                                                                                                                                                                                                                                                                                                                                                                                                                                                                                                                                                                                                                                                                                                                                                                                                                                                                                                                                                                                                                                                                                                                                                                                                                                                                                                                                                                                                                                                                                                                                                                                                             |                |              |
| Site PI              | Jianhua Sun                                                                                                                                                                                                                                                                                                                                                                                                                                                                                                                                                                                                                                                                                                                                                                                                                                                                                                                                                                                                                                                                                                                                                                                                                                                                                                                                                                                                                                                                                                                                                                                                                                                                                                                                                                                                                                                                                                                                                                                                                                                                                                                                                                                                                                           |                |              |
| Review Attribute     | Second review                                                                                                                                                                                                                                                                                                                                                                                                                                                                                                                                                                                                                                                                                                                                                                                                                                                                                                                                                                                                                                                                                                                                                                                                                                                                                                                                                                                                                                                                                                                                                                                                                                                                                                                                                                                                                                                                                                                                                                                                                                                                                                                                                                                                                                         | Review methods | Quick Review |
| Review Date          | June 18, 2019                                                                                                                                                                                                                                                                                                                                                                                                                                                                                                                                                                                                                                                                                                                                                                                                                                                                                                                                                                                                                                                                                                                                                                                                                                                                                                                                                                                                                                                                                                                                                                                                                                                                                                                                                                                                                                                                                                                                                                                                                                                                                                                                                                                                                                         | Review Place   |              |
| Committee Member     | Yuhong Xu                                                                                                                                                                                                                                                                                                                                                                                                                                                                                                                                                                                                                                                                                                                                                                                                                                                                                                                                                                                                                                                                                                                                                                                                                                                                                                                                                                                                                                                                                                                                                                                                                                                                                                                                                                                                                                                                                                                                                                                                                                                                                                                                                                                                                                             |                |              |
| Approval Files       | Revised study Protocol( VERSION_ 2019040901/April 9, 2019 ) , Revised participant recruitment advertisement (VERSION_ 2019040901/April 9, 2019), Revised informed Consent(VERSION_ 2019040901/April 9, 2019)                                                                                                                                                                                                                                                                                                                                                                                                                                                                                                                                                                                                                                                                                                                                                                                                                                                                                                                                                                                                                                                                                                                                                                                                                                                                                                                                                                                                                                                                                                                                                                                                                                                                                                                                                                                                                                                                                                                                                                                                                                          |                |              |
| Review Comments      | <p>According to “ethical review methods for biomedical study involving human subjects(2016)” issued by the Ministry of Health, “Good Clinical Practice(2003)”, “Provisions for Clinical Trials of Medical Device(2016)”, “Declaration of Helsinki” and “International ethical guidelines for biomedical research involving human subjects” issued by Council for International Organizations of Medical Sciences, this clinical research was reviewed by the institutional review board (IRB) of Guang’anmen Hospital of China Academy of Chinese Medical Sciences. And the study protocol, informed consent, and the recruitment files of this research were approved.</p> <p>Please conduct this clinical study following the GCP principles and the study protocol approved by the IRB. The health and rights of the subjects should be protected throughout the whole study.</p> <p>Prior to the implementation of a research project approved by the ethics committee, the principal of the research project shall register the main contents and ethical review decisions of the research project in the medical research Registration and archival Information system. Research projects involving Chinese human genetic resources that need to be submitted for approval should be approved by the Chinese Office of Human Genetic Resources Management before starting research.</p> <p>An application should be submitted if a change of the principle investigator (PI), or any modification of the study protocol, informed consent, or the recruitment files are made.</p> <p>If a serious adverse event occurs, the applicant should submit a serious adverse event report in time</p> <p>Researchers should submit report of the study progress one month before the deadline according to ethical review frequency. A summary report of the study progress of each site should be submitted by the site PI to the IRB of the leading site. In any condition which will greatly affect the progress of the study or increase the potential risk of the subjects, a written report should be submitted by the site PI to the IRB. Beyond the period of validity, if research progress report of the study project was not submitted</p> |                |              |



|                                                                                                                                     |                                                                                                                                                                                                                                                                                                                                                                                                                                                                                                                                                                                                                                                                                                                                                                                                                                                                                                                                                                                                                                                                                                                                                                                                             |
|-------------------------------------------------------------------------------------------------------------------------------------|-------------------------------------------------------------------------------------------------------------------------------------------------------------------------------------------------------------------------------------------------------------------------------------------------------------------------------------------------------------------------------------------------------------------------------------------------------------------------------------------------------------------------------------------------------------------------------------------------------------------------------------------------------------------------------------------------------------------------------------------------------------------------------------------------------------------------------------------------------------------------------------------------------------------------------------------------------------------------------------------------------------------------------------------------------------------------------------------------------------------------------------------------------------------------------------------------------------|
|                                                                                                                                     | <p>and the study was not obtaining ethical approval to continue the study project, researchers must immediately stop all research activities, including intervention and data collection. If discontinuing the study intervention could cause harm to the subject, the investigator should ask the ethics committee to approve the continuing study of the subject.</p> <p>A protocol deviation report should be submitted by the site PI/monitor/researcher if any of the following occurs: conditions that violate the study protocol: subjects who did not meet the inclusion criteria, or should be excluded according to the exclusion criteria, were wrongly included in the study; incorrect treatment or dose was given; prohibited combined medicine was used; conditions that violate GCP principle: subjects' rights and health are badly affected; the science of study was badly affected. If the applicant has suspended or terminated the clinical study in advance, please submit the suspension/termination report timely.</p> <p>To complete the clinical study, applicants shall submit a study completion report and a summary report outlining the study findings and conclusions.</p> |
| Annual/Regular tracking review frequency                                                                                            | Please submit the research progress report one month before June 18, 2020                                                                                                                                                                                                                                                                                                                                                                                                                                                                                                                                                                                                                                                                                                                                                                                                                                                                                                                                                                                                                                                                                                                                   |
| Validity Period                                                                                                                     | 12 months                                                                                                                                                                                                                                                                                                                                                                                                                                                                                                                                                                                                                                                                                                                                                                                                                                                                                                                                                                                                                                                                                                                                                                                                   |
| Contact                                                                                                                             | Jing Wu, +86 025-86560515                                                                                                                                                                                                                                                                                                                                                                                                                                                                                                                                                                                                                                                                                                                                                                                                                                                                                                                                                                                                                                                                                                                                                                                   |
| Director Signature                                                                                                                  | Ming hua Wu                                                                                                                                                                                                                                                                                                                                                                                                                                                                                                                                                                                                                                                                                                                                                                                                                                                                                                                                                                                                                                                                                                                                                                                                 |
| IRB of 4. Jiangsu Province Hospital of Traditional Chinese Medicine of Nanjing University of<br>Traditional Chinese Medicine (Seal) |                                                                                                                                                                                                                                                                                                                                                                                                                                                                                                                                                                                                                                                                                                                                                                                                                                                                                                                                                                                                                                                                                                                                                                                                             |
| Date: June 18, 2019                                                                                                                 |                                                                                                                                                                                                                                                                                                                                                                                                                                                                                                                                                                                                                                                                                                                                                                                                                                                                                                                                                                                                                                                                                                                                                                                                             |

60

61

## 伦理审查批件

|             |                                                                                                                                                                                                                                                                                                                                                                                                                                                                                                                                                                                                                                                                                                                                                                                                                                                                                                                                                                        |      |      |
|-------------|------------------------------------------------------------------------------------------------------------------------------------------------------------------------------------------------------------------------------------------------------------------------------------------------------------------------------------------------------------------------------------------------------------------------------------------------------------------------------------------------------------------------------------------------------------------------------------------------------------------------------------------------------------------------------------------------------------------------------------------------------------------------------------------------------------------------------------------------------------------------------------------------------------------------------------------------------------------------|------|------|
| 批件号         | 2019NL-031-03                                                                                                                                                                                                                                                                                                                                                                                                                                                                                                                                                                                                                                                                                                                                                                                                                                                                                                                                                          |      |      |
| 项目名称        | 电针缓解癌痛阿片类药物性便秘-随机对照试验                                                                                                                                                                                                                                                                                                                                                                                                                                                                                                                                                                                                                                                                                                                                                                                                                                                                                                                                                  |      |      |
| 项目来源        | 中国中医科学院广安门医院自拟课题                                                                                                                                                                                                                                                                                                                                                                                                                                                                                                                                                                                                                                                                                                                                                                                                                                                                                                                                                       |      |      |
| 研究单位        | 江苏省中医院                                                                                                                                                                                                                                                                                                                                                                                                                                                                                                                                                                                                                                                                                                                                                                                                                                                                                                                                                                 |      |      |
| 主要研究者       | 孙建华                                                                                                                                                                                                                                                                                                                                                                                                                                                                                                                                                                                                                                                                                                                                                                                                                                                                                                                                                                    |      |      |
| 审查类别        | 复审申请                                                                                                                                                                                                                                                                                                                                                                                                                                                                                                                                                                                                                                                                                                                                                                                                                                                                                                                                                                   | 审查方式 | 快速审查 |
| 审查日期        | 2019年06月18日                                                                                                                                                                                                                                                                                                                                                                                                                                                                                                                                                                                                                                                                                                                                                                                                                                                                                                                                                            | 审查地点 |      |
| 审查委员        | 徐玉红                                                                                                                                                                                                                                                                                                                                                                                                                                                                                                                                                                                                                                                                                                                                                                                                                                                                                                                                                                    |      |      |
| 审查批准文件      | 修正的临床研究方案 版本号: 2019040901 版本日期: 2019-04-09<br>修正的招募材料 版本号: 2019040901 版本日期: 2019-04-09<br>修正的知情同意书 版本号: 2019061201 版本日期: 2019-06-12                                                                                                                                                                                                                                                                                                                                                                                                                                                                                                                                                                                                                                                                                                                                                                                                                                    |      |      |
| 审查意见        | <p>根据国家卫生计生委《涉及人的生物医学研究伦理审查办法》(2016)、CFDA《药物临床试验质量管理规范》(2003)、《医疗器械临床试验质量管理规范》(2016)、WMA《赫尔辛基宣言》和 CIOMS《涉及人的生物医学研究国际伦理审查指南》的伦理原则, 经本伦理委员会审查, 同意按所批准的临床研究方案、知情同意书、招募材料开展本项研究。</p> <p>请遵循 GCP 原则、遵循伦理委员会批准的方案开展临床研究, 保护受试者的健康与权利。</p> <p>经伦理委员会批准的研究项目在实施前, 项目负责人应当将该研究项目的主要内容、伦理审查决定在医学研究登记备案信息系统进行登记。凡涉及中国人类遗传资源、需要报批的研究项目, 应在获得中国人类遗传资源管理办公室批准后才能开始研究。</p> <p>研究过程中若变更主要研究者, 对临床研究方案、知情同意书、招募材料等的任何修改, 请申请人提交修正案审查申请。</p> <p>发生严重不良事件, 请申请人及时提交严重不良事件报告。</p> <p>请按照伦理委员会规定的年度/定期审查频率, 申请人在截止日期前 1 个月提交研究进展报告; 申办者应当向组长单位伦理委员会提交各中心研究进展的汇总报告; 当出现任何可能显著影响试验进行、或增加受试者危险的情况时, 请申请人及时向伦理委员会提交书面报告。超出批件有效期, 没有提交研究进展报告并获得伦理审查批准继续研究的项目, 研究者必须立即停止所有研究活动, 包括干预措施和数据收集。假若停止研究干预可能会对受试者造成伤害, 研究者应当要求伦理委员会批准在研的受试者继续参加研究。</p> <p>研究纳入了不符合纳入标准或符合排除标准的受试者, 符合中止试验规定而未让受试者退出研究, 给予错误治疗或剂量, 给予方案禁止的合并用药等没有遵从方案开展研究的情况; 或可能对受试者的权益/健康、以及研究的科学性造成不良影响等违背 GCP 原则的情况, 请申办者/监查员/研究者提交违背方案报告。</p> <p>申请人暂停或提前终止临床研究, 请及时提交暂停/终止研究报告。</p> <p>完成临床研究, 请申请人提交研究完成报告, 以及概述研究发现和结论的总结报告。</p> |      |      |
| 年度/定期跟踪审查频率 | 请于 2020 年 06 月 18 日前 1 个月提交研究进展报告                                                                                                                                                                                                                                                                                                                                                                                                                                                                                                                                                                                                                                                                                                                                                                                                                                                                                                                                      |      |      |
| 有效期         | 12 个月                                                                                                                                                                                                                                                                                                                                                                                                                                                                                                                                                                                                                                                                                                                                                                                                                                                                                                                                                                  |      |      |
| 联系人及联系电话    | 吴静 025-86560515                                                                                                                                                                                                                                                                                                                                                                                                                                                                                                                                                                                                                                                                                                                                                                                                                                                                                                                                                        |      |      |
| 主席签字        | 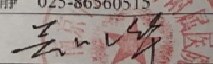                                                                                                                                                                                                                                                                                                                                                                                                                                                                                                                                                                                                                                                                                                                                                                                                                                                                                    |      |      |
| 伦理委员会       | 南京中医药大学附属医院 (江苏省中医院) 伦理委员会 (盖章)                                                                                                                                                                                                                                                                                                                                                                                                                                                                                                                                                                                                                                                                                                                                                                                                                                                                                                                                        |      |      |
| 日期          | 2019 年 06 月 18 日                                                                                                                                                                                                                                                                                                                                                                                                                                                                                                                                                                                                                                                                                                                                                                                                                                                                                                                                                       |      |      |

65 **Ethical Approvals of Hengyang Hospital affiliated with Hunan University of**  
 66 **Chinese Medicine**

|                    |                                                                                                                                                                                                                                                                                                                                                                                                                                                                                                                                                                                                                                                                                                                                                                                                                                                                                                                                                                                                                                                                                                                                                                                                                                                                                                                                                                                                                                                                                                                                                                                                                                                                                                                                                                                                                                                                                                                                                                                                              |                |                                                                          |
|--------------------|--------------------------------------------------------------------------------------------------------------------------------------------------------------------------------------------------------------------------------------------------------------------------------------------------------------------------------------------------------------------------------------------------------------------------------------------------------------------------------------------------------------------------------------------------------------------------------------------------------------------------------------------------------------------------------------------------------------------------------------------------------------------------------------------------------------------------------------------------------------------------------------------------------------------------------------------------------------------------------------------------------------------------------------------------------------------------------------------------------------------------------------------------------------------------------------------------------------------------------------------------------------------------------------------------------------------------------------------------------------------------------------------------------------------------------------------------------------------------------------------------------------------------------------------------------------------------------------------------------------------------------------------------------------------------------------------------------------------------------------------------------------------------------------------------------------------------------------------------------------------------------------------------------------------------------------------------------------------------------------------------------------|----------------|--------------------------------------------------------------------------|
| Trial name         | Effect of acupuncture for opioid-induced constipation in patients with cancer: a randomized controlled trial                                                                                                                                                                                                                                                                                                                                                                                                                                                                                                                                                                                                                                                                                                                                                                                                                                                                                                                                                                                                                                                                                                                                                                                                                                                                                                                                                                                                                                                                                                                                                                                                                                                                                                                                                                                                                                                                                                 |                |                                                                          |
| Project Sponsor    | Guang'an men Hospital Affiliated to China Academy of Chinese Medical Sciences                                                                                                                                                                                                                                                                                                                                                                                                                                                                                                                                                                                                                                                                                                                                                                                                                                                                                                                                                                                                                                                                                                                                                                                                                                                                                                                                                                                                                                                                                                                                                                                                                                                                                                                                                                                                                                                                                                                                |                |                                                                          |
| Site               | Hengyang Hospital affiliated with Hunan University of Chinese Medicine                                                                                                                                                                                                                                                                                                                                                                                                                                                                                                                                                                                                                                                                                                                                                                                                                                                                                                                                                                                                                                                                                                                                                                                                                                                                                                                                                                                                                                                                                                                                                                                                                                                                                                                                                                                                                                                                                                                                       |                |                                                                          |
| Applicant (if any) | /                                                                                                                                                                                                                                                                                                                                                                                                                                                                                                                                                                                                                                                                                                                                                                                                                                                                                                                                                                                                                                                                                                                                                                                                                                                                                                                                                                                                                                                                                                                                                                                                                                                                                                                                                                                                                                                                                                                                                                                                            |                |                                                                          |
| Site PI            | Zenghui Yue, Jun Xie                                                                                                                                                                                                                                                                                                                                                                                                                                                                                                                                                                                                                                                                                                                                                                                                                                                                                                                                                                                                                                                                                                                                                                                                                                                                                                                                                                                                                                                                                                                                                                                                                                                                                                                                                                                                                                                                                                                                                                                         |                |                                                                          |
| Review Attribute   | Initial review                                                                                                                                                                                                                                                                                                                                                                                                                                                                                                                                                                                                                                                                                                                                                                                                                                                                                                                                                                                                                                                                                                                                                                                                                                                                                                                                                                                                                                                                                                                                                                                                                                                                                                                                                                                                                                                                                                                                                                                               | Review Methods | Quick review                                                             |
| Review Date        | January 12, 2019                                                                                                                                                                                                                                                                                                                                                                                                                                                                                                                                                                                                                                                                                                                                                                                                                                                                                                                                                                                                                                                                                                                                                                                                                                                                                                                                                                                                                                                                                                                                                                                                                                                                                                                                                                                                                                                                                                                                                                                             | Review Place   | Conference room, the 9 <sup>th</sup> floor of hospital clinical building |
| Committee Member   | Chengxi Wang, Shuangcai Long, Yueping Zou, Jiping Xu, Xinlin Zhong, Zhao Kuang, Qiuping Dong                                                                                                                                                                                                                                                                                                                                                                                                                                                                                                                                                                                                                                                                                                                                                                                                                                                                                                                                                                                                                                                                                                                                                                                                                                                                                                                                                                                                                                                                                                                                                                                                                                                                                                                                                                                                                                                                                                                 |                |                                                                          |
| Approval Files     | Study Protocol ( VERSION1.0 _ 2018093001 ) , Informed Consent ( VERSION1.0_ 2018113001 )                                                                                                                                                                                                                                                                                                                                                                                                                                                                                                                                                                                                                                                                                                                                                                                                                                                                                                                                                                                                                                                                                                                                                                                                                                                                                                                                                                                                                                                                                                                                                                                                                                                                                                                                                                                                                                                                                                                     |                |                                                                          |
| Review Comments    | <p>According to “ethical review methods for biomedical study involving human subjects” issued by the Ministry of Health, “Good Clinical Practice”, “Provisions for Clinical Trials of Medical Device” and “Guidelines for Ethical Review Work of Drug Clinical Trials” issued by State Food and Drug Administration (SFDA) of the People’s Republic of China, “management specifications for ethical review of TCM clinical studies” issued by State Administration of Traditional Chinese Medicine, “Declaration of Helsinki”, and “International ethical guidelines for biomedical research involving human subjects” issued by Council for International Organizations of Medical Sciences, this clinical research was reviewed by the institutional review board (IRB) of the Hengyang Hospital affiliated with Hunan University of Chinese Medicine. And the study protocol, informed consent, and the recruitment files of this research were approved.</p> <p>Please conduct this clinical study following the GCP principles and the study protocol approved by the IRB. The health and rights of the subjects should be protected throughout the whole study.</p> <p>An application should be submitted if a change of the principle investigator (PI), or any modification of the study protocol, informed consent, or the recruitment files are made.</p> <p>A report of the severe adverse events (SAE) should be submitted in time if any SAE or any other un-anticipated AE, which will affect the risk-reward ratio of this study, occurs.</p> <p>Researchers should submit report of the study progress one month before the deadline according to ethical review frequency. A summary report of the study progress of each site should be submitted by the site PI to the IRB of the leading site. In any condition which will greatly affect the progress of the study or increase the potential risk of the subjects, a written report should be submitted by the site PI to the IRB.</p> |                |                                                                          |

|                                                                                                                   |                                                                                                                                                                                                                                                                                                                                                                                                                                                                                                                                                                                                                                                                                                                                        |
|-------------------------------------------------------------------------------------------------------------------|----------------------------------------------------------------------------------------------------------------------------------------------------------------------------------------------------------------------------------------------------------------------------------------------------------------------------------------------------------------------------------------------------------------------------------------------------------------------------------------------------------------------------------------------------------------------------------------------------------------------------------------------------------------------------------------------------------------------------------------|
|                                                                                                                   | <p>A protocol deviation report should be submitted by the site PI/monitor/researcher if any of the following occurs: 1) conditions that violate the study protocol: subjects who did not meet the inclusion criteria, or should be excluded according to the exclusion criteria, were wrongly included in the study; subjects do not withdraw from the study when he/she meet the rules of withdrawal; incorrect treatment or dose was given; prohibited combined medicine was used; 2) conditions that violate GCP principle: subjects' rights and health are badly affected; the science of study was badly affected.</p> <p>A final report should be submitted when the study is finished completely or terminated prematurely.</p> |
| Validity Period                                                                                                   | From February, 2019 to February, 2020                                                                                                                                                                                                                                                                                                                                                                                                                                                                                                                                                                                                                                                                                                  |
| Contact                                                                                                           | +86 0734-8137737; Jun Xie                                                                                                                                                                                                                                                                                                                                                                                                                                                                                                                                                                                                                                                                                                              |
| Director<br>Signature                                                                                             | Chengxi Wang                                                                                                                                                                                                                                                                                                                                                                                                                                                                                                                                                                                                                                                                                                                           |
| Institutional Ethics Committee of Hengyang Hospital affiliated with Hunan University of Chinese<br>Medicine(Seal) |                                                                                                                                                                                                                                                                                                                                                                                                                                                                                                                                                                                                                                                                                                                                        |
| Date: January 16, 2019                                                                                            |                                                                                                                                                                                                                                                                                                                                                                                                                                                                                                                                                                                                                                                                                                                                        |

67 Version No.1.00/Version Date January 16, 2019

Page 1 of 1

68

湖南中医药大学附属岳阳医院伦理委员会文件 (EQ-HE-2019006)  
伦理审查批件

|          |                                                                                                                                                                                                                                                                                                                                                                                                                                                                                                                                                                                                                                                                                               |      |            |
|----------|-----------------------------------------------------------------------------------------------------------------------------------------------------------------------------------------------------------------------------------------------------------------------------------------------------------------------------------------------------------------------------------------------------------------------------------------------------------------------------------------------------------------------------------------------------------------------------------------------------------------------------------------------------------------------------------------------|------|------------|
| 项目名称     | 电针缓解疼痛阿片类药物性便秘一随机对照试验                                                                                                                                                                                                                                                                                                                                                                                                                                                                                                                                                                                                                                                                         |      |            |
| 项目来源与编号  | 中国中医科学院基本科研业务费自主选题项目                                                                                                                                                                                                                                                                                                                                                                                                                                                                                                                                                                                                                                                                          |      |            |
| 牵头单位     | 湖南中医药大学附属岳阳医院                                                                                                                                                                                                                                                                                                                                                                                                                                                                                                                                                                                                                                                                                 |      |            |
| 申办者 (如有) |                                                                                                                                                                                                                                                                                                                                                                                                                                                                                                                                                                                                                                                                                               |      |            |
| 主要研究者    | 岳维麟、谢军                                                                                                                                                                                                                                                                                                                                                                                                                                                                                                                                                                                                                                                                                        |      |            |
| 审查类别     | 初始审查                                                                                                                                                                                                                                                                                                                                                                                                                                                                                                                                                                                                                                                                                          | 审查方式 | 快速审查       |
| 审查日期     | 2019.01.12                                                                                                                                                                                                                                                                                                                                                                                                                                                                                                                                                                                                                                                                                    | 审查地点 | 医院门诊楼9楼会议室 |
| 审查委员     | 王诚嘉、龙双才、郑志萍、徐基平、钟新林、匡强、董秋萍                                                                                                                                                                                                                                                                                                                                                                                                                                                                                                                                                                                                                                                                    |      |            |
| 批准文件     | 研究方案: (版本号: 2018053001)<br>知情同意书: (版本号: 2018113001)                                                                                                                                                                                                                                                                                                                                                                                                                                                                                                                                                                                                                                           |      |            |
| 审查意见     | <p>根据卫生部《涉及人的生物医学研究伦理审查办法(试行)》、国家药品监督管理局《药物临床试验质量管理规范》、《医疗器械临床试验规定》、《药物临床试验伦理审查工作指导原则》、国家中医药管理局《中药临床研究伦理审查管理规范》以及《赫尔辛基宣言》和国际医学科学组织委员会颁布的《人体生物医学研究国际道德指南》的伦理原则,经本伦理委员会审查,统一按所批准的临床研究方案、知情同意书、招募材料开展本研究。</p> <p>请遵照GCP原则,遵照伦理委员会批准的方案开展临床研究,保护受试者的健康与权力。</p> <p>研究过程中若变更主要研究者,对临床研究方案、知情同意书、招募材料等的任何修改,请申请人提交修正案审查申请。</p> <p>如发生严重不良事件以及影响研究风险受益比的非预期不良事件,请申请人及时提交不良事件报告。</p> <p>请按伦理委员会规定的年度/定期跟踪审查频率,申请人在截止日期前1个月提交研究进展报告;申报者应当向组长单位伦理委员会提交各中心的研究进展的汇总报告;当出现任何可能显著影响实验进行或增加受试者危险的情况时,请申请人及时向伦理委员会提交书面报告。</p> <p>研究纳入了不符合纳入标准或符合排除标准的受试者,符合中止实验规定而未让受试者退出研究,给予错误治疗或剂量,给以方案禁止的合并用药等没有遵从方案开展研究的情况;或可能对受试者的权益/健康以及研究的科学性造成不良影响等违背GCP原则的情况,请申办者/监察员/研究者提交违背方案报告。</p> <p>提前终止或完成临床研究,请及时提交结题报告。</p> |      |            |
| 有效期      | 2019年2月-2020年2月                                                                                                                                                                                                                                                                                                                                                                                                                                                                                                                                                                                                                                                                               |      |            |
| 联系人及电话   | 谢军: 0731-8357737                                                                                                                                                                                                                                                                                                                                                                                                                                                                                                                                                                                                                                                                              |      |            |
| 主任委员签字   | 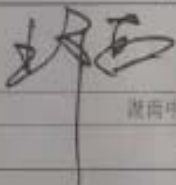                                                                                                                                                                                                                                                                                                                                                                                                                                                                                                                       |      |            |
|          | 湖南中医药大学附属岳阳医院伦理委员会(盖章)                                                                                                                                                                                                                                                                                                                                                                                                                                                                                                                                                                                                                                                                        |      |            |
|          | 2019年1月12日                                                                                                                                                                                                                                                                                                                                                                                                                                                                                                                                                                                                                                                                                    |      |            |

版本号: 1.00/版本 日期: 20190110

共1页/第1页

70 **Ethical Approvals of Yantai Hospital of Traditional Chinese Medicine**

|                    |                                                                                                                                                                                                                                                                                                                                                                                                                                                                                                                                                                                                                                                                                                                                                                                                                                                                                                                                                                                                                                                                                                                                                                                                                                                                        |                     |                                                 |
|--------------------|------------------------------------------------------------------------------------------------------------------------------------------------------------------------------------------------------------------------------------------------------------------------------------------------------------------------------------------------------------------------------------------------------------------------------------------------------------------------------------------------------------------------------------------------------------------------------------------------------------------------------------------------------------------------------------------------------------------------------------------------------------------------------------------------------------------------------------------------------------------------------------------------------------------------------------------------------------------------------------------------------------------------------------------------------------------------------------------------------------------------------------------------------------------------------------------------------------------------------------------------------------------------|---------------------|-------------------------------------------------|
| Trial name         | Effect of acupuncture for opioid-induced constipation in patients with cancer: a randomized controlled trial                                                                                                                                                                                                                                                                                                                                                                                                                                                                                                                                                                                                                                                                                                                                                                                                                                                                                                                                                                                                                                                                                                                                                           |                     |                                                 |
| Approval No.       | 2018-KY-026                                                                                                                                                                                                                                                                                                                                                                                                                                                                                                                                                                                                                                                                                                                                                                                                                                                                                                                                                                                                                                                                                                                                                                                                                                                            | Project Sponsor     | Investigator                                    |
| Applicant (if any) | /                                                                                                                                                                                                                                                                                                                                                                                                                                                                                                                                                                                                                                                                                                                                                                                                                                                                                                                                                                                                                                                                                                                                                                                                                                                                      |                     |                                                 |
| Site PI            | Zhiwei Zang                                                                                                                                                                                                                                                                                                                                                                                                                                                                                                                                                                                                                                                                                                                                                                                                                                                                                                                                                                                                                                                                                                                                                                                                                                                            | Research department | Acupuncture and Moxibustion Department          |
| Review Attribute   | Initial review                                                                                                                                                                                                                                                                                                                                                                                                                                                                                                                                                                                                                                                                                                                                                                                                                                                                                                                                                                                                                                                                                                                                                                                                                                                         | Review Methods      | Quick review                                    |
| Review Date        | December 29, 2018                                                                                                                                                                                                                                                                                                                                                                                                                                                                                                                                                                                                                                                                                                                                                                                                                                                                                                                                                                                                                                                                                                                                                                                                                                                      | Review Place        | Yantai Hospital of Traditional Chinese Medicine |
| Applicant (if any) | /                                                                                                                                                                                                                                                                                                                                                                                                                                                                                                                                                                                                                                                                                                                                                                                                                                                                                                                                                                                                                                                                                                                                                                                                                                                                      |                     |                                                 |
| Site PI            | Zhiwei Zang                                                                                                                                                                                                                                                                                                                                                                                                                                                                                                                                                                                                                                                                                                                                                                                                                                                                                                                                                                                                                                                                                                                                                                                                                                                            |                     |                                                 |
| Review Attribute   | Second review                                                                                                                                                                                                                                                                                                                                                                                                                                                                                                                                                                                                                                                                                                                                                                                                                                                                                                                                                                                                                                                                                                                                                                                                                                                          | Review Methods      | Quick review                                    |
| Review Date        | May 15, 2013                                                                                                                                                                                                                                                                                                                                                                                                                                                                                                                                                                                                                                                                                                                                                                                                                                                                                                                                                                                                                                                                                                                                                                                                                                                           | Review Place        | Yantai Hospital of Traditional Chinese Medicine |
| Committee Member   | Alhua Hou, Bo Liang                                                                                                                                                                                                                                                                                                                                                                                                                                                                                                                                                                                                                                                                                                                                                                                                                                                                                                                                                                                                                                                                                                                                                                                                                                                    |                     |                                                 |
| Approval Files     | <p>1. Study Protocol ( VERSION1.0_ 2018093001/September 30, 2018 ) ,</p> <p>2. Case Report Form(VERSION1.0_ 2018093001/September 30, 2018),</p> <p>3.Informed Consent ( VERSION1.0_ 2018093001/September 30, 2018 ) ,</p> <p>4. Participant recruitment advertisement (VERSION1.0_ 2018093001/September 30, 2018),</p> <p>5. Diary card in screening period (VERSION1.0_ 2018093001/September 30, 2018),</p> <p>6.Diary card in treatment period (VERSION1.0_ 2018093001/September 30, 2018),</p> <p>7. Diary card in follow-up period (VERSION1.0_ 2018093001/September 30, 2018),</p> <p>8. Investigator's Brochure(VERSION1.0_ 2018093001/September 30, 2018),</p> <p>9.Emergency plan(VERSION1.0_ 2018093001/September 30, 2018).</p>                                                                                                                                                                                                                                                                                                                                                                                                                                                                                                                              |                     |                                                 |
| Review Comments    | <p>According to “ethical review methods for biomedical study involving human subjects” issued by the Ministry of Health, “Good Clinical Practice”, “Provisions for Clinical Trials of Medical Device” and “Guidelines for Ethical Review Work of Drug Clinical Trials” issued by State Food and Drug Administration (SFDA) of the People’s Republic of China, “management specifications for ethical review of TCM clinical studies” issued by State Administration of Traditional Chinese Medicine, “Declaration of Helsinki”, and “International ethical guidelines for biomedical research involving human subjects” issued by Council for International Organizations of Medical Sciences, this clinical research was reviewed by the institutional review board (IRB) of Guang’anmen Hospital of China Academy of Chinese Medical Sciences. And the study protocol, informed consent, and the recruitment files of this research were approved.</p> <p>Please conduct this clinical study following the GCP principles and the study protocol approved by the IRB. The health and rights of the subjects should be protected throughout the whole study.</p> <p>This approval will be invalid if the trial could not be initiated within three years, and the</p> |                     |                                                 |

|                                                        |                                                                                                                                                                                                                                                                                                                                                                                                                                                                                                                                                                                                                                                                                                                                                                                                                                                                                                                                                                                                                                                                                                                                                                                                                                                                                                                                                                                                                                                                                                                                                                                                                                                      |                      |                   |
|--------------------------------------------------------|------------------------------------------------------------------------------------------------------------------------------------------------------------------------------------------------------------------------------------------------------------------------------------------------------------------------------------------------------------------------------------------------------------------------------------------------------------------------------------------------------------------------------------------------------------------------------------------------------------------------------------------------------------------------------------------------------------------------------------------------------------------------------------------------------------------------------------------------------------------------------------------------------------------------------------------------------------------------------------------------------------------------------------------------------------------------------------------------------------------------------------------------------------------------------------------------------------------------------------------------------------------------------------------------------------------------------------------------------------------------------------------------------------------------------------------------------------------------------------------------------------------------------------------------------------------------------------------------------------------------------------------------------|----------------------|-------------------|
|                                                        | <p>application should be resubmitted.</p> <p>An application should be submitted if a change of the principle investigator (PI), or any modification of the study protocol, informed consent, or the recruitment files are made.</p> <p>A report of the severe adverse events (SAE) should be submitted within 15 working days if any SAE or any other un-anticipated AE, which will affect the risk-reward ratio of this study, occurs. If a fatal adverse event occurs, please submit a serious adverse event report as soon as it becomes known.</p> <p>Researchers should submit report of the study progress one month before the deadline according to ethical review frequency. A summary report of the study progress of each site should be submitted by the site PI to the IRB of the leading site. In any condition which will greatly affect the progress of the study or increase the potential risk of the subjects, a written report should be submitted by the site PI to the IRB.</p> <p>A protocol deviation report should be submitted by the site PI/monitor/researcher if any of the following occurs: conditions that violate the study protocol: subjects who did not meet the inclusion criteria, or should be excluded according to the exclusion criteria, were wrongly included in the study; incorrect treatment or dose was given; prohibited combined medicine was used; conditions that violate GCP principle: subjects' rights and health are badly affected; the science of study was badly affected.</p> <p>A final report should be submitted when the study is finished completely or terminated prematurely.</p> |                      |                   |
| Validity Period                                        | From December 30, 2018 to December 29, 2019                                                                                                                                                                                                                                                                                                                                                                                                                                                                                                                                                                                                                                                                                                                                                                                                                                                                                                                                                                                                                                                                                                                                                                                                                                                                                                                                                                                                                                                                                                                                                                                                          |                      |                   |
| Tracking review frequency                              | 12 months                                                                                                                                                                                                                                                                                                                                                                                                                                                                                                                                                                                                                                                                                                                                                                                                                                                                                                                                                                                                                                                                                                                                                                                                                                                                                                                                                                                                                                                                                                                                                                                                                                            | Tracking review date | December 29, 2019 |
| Contact                                                | Jinghua Ma, +86 0535-6597012, E-mail: kjk2127022@163.com                                                                                                                                                                                                                                                                                                                                                                                                                                                                                                                                                                                                                                                                                                                                                                                                                                                                                                                                                                                                                                                                                                                                                                                                                                                                                                                                                                                                                                                                                                                                                                                             |                      |                   |
| Director Signature                                     | Yunpeng Liu                                                                                                                                                                                                                                                                                                                                                                                                                                                                                                                                                                                                                                                                                                                                                                                                                                                                                                                                                                                                                                                                                                                                                                                                                                                                                                                                                                                                                                                                                                                                                                                                                                          |                      |                   |
| Yantai Hospital of Traditional Chinese Medicine (Seal) |                                                                                                                                                                                                                                                                                                                                                                                                                                                                                                                                                                                                                                                                                                                                                                                                                                                                                                                                                                                                                                                                                                                                                                                                                                                                                                                                                                                                                                                                                                                                                                                                                                                      |                      |                   |
| Date: December 29, 2018                                |                                                                                                                                                                                                                                                                                                                                                                                                                                                                                                                                                                                                                                                                                                                                                                                                                                                                                                                                                                                                                                                                                                                                                                                                                                                                                                                                                                                                                                                                                                                                                                                                                                                      |                      |                   |

71  
72

### 烟台市中医医院伦理审查批件

|         |                                                                                                                                                                                                                                                                                                                                                                                                                                              |      |         |
|---------|----------------------------------------------------------------------------------------------------------------------------------------------------------------------------------------------------------------------------------------------------------------------------------------------------------------------------------------------------------------------------------------------------------------------------------------------|------|---------|
| 项目名称    | 电针缓解癌痛阿片类药物性便秘-随机对照试验                                                                                                                                                                                                                                                                                                                                                                                                                        |      |         |
| 批件号     | 2018-KY-026                                                                                                                                                                                                                                                                                                                                                                                                                                  | 项目来源 | 研究者     |
| 研究单位    | 烟台市中医医院                                                                                                                                                                                                                                                                                                                                                                                                                                      |      |         |
| 申办者     | 无                                                                                                                                                                                                                                                                                                                                                                                                                                            |      |         |
| 主要研究者   | 臧志伟                                                                                                                                                                                                                                                                                                                                                                                                                                          | 研究科室 | 针灸推拿科   |
| 审查类别    | 初始审查                                                                                                                                                                                                                                                                                                                                                                                                                                         | 审查方式 | 快速审查    |
| 审查日期    | 2018-12-29                                                                                                                                                                                                                                                                                                                                                                                                                                   | 审查地点 | 烟台市中医医院 |
| 审查委员    | 侯爱画、梁波                                                                                                                                                                                                                                                                                                                                                                                                                                       |      |         |
| 批准文件及版本 | 1. 研究方案（版本号：2018093001；版本日期：2018-9-30）<br>2. 病例报告表（版本号：VEHION 1.0_20180930；版本日期：2018-09-30）<br>3. 知情同意书（版本号：2018113001；版本日期：2018-11-30）<br>4. 招募广告（版本号：20180930；版本日期：2018-09-30）<br>5. 日记卡-筛选期（版本号：VEHION 1.0_20180930；版本日期：2018-09-30）<br>6. 日记卡-治疗期（版本号：VEHION 1.0_20180930；版本日期：2018-09-30）<br>7. 日记卡-随访期（版本号：VEHION 1.0_20180930；版本日期：2018-09-30）<br>8. 研究者手册（版本号：2018093001；版本日期：2018-09-30）<br>9. 应急预案（版本号：2018113001；版本日期：2018-11-30） |      |         |
| 审查意见    | 根据国家卫生计生委《涉及人的生物医学研究伦理审查办法》、国家药品监督管理局《药物临床试验质量管理规范》、《医疗器械临床试验规定》、《药物临床试验伦理审查工作指导原则》国家中医药管理局《中医药临床研究伦理审查管理规范》以及《赫尔辛基宣言》和国际医学科学组织委员会颁布的《人体生物学研究国际道德指南》的伦理原则，经本伦理委员会审查，同意按所批准的临床研究方案、知情同意书材料开展本项研究。                                                                                                                                                                                                                                             |      |         |

73

74



|                                                                                                          |                                                                                                                                                                                                                                                                                                                                                                                                                                                                                                                                                                          |          |                  |
|----------------------------------------------------------------------------------------------------------|--------------------------------------------------------------------------------------------------------------------------------------------------------------------------------------------------------------------------------------------------------------------------------------------------------------------------------------------------------------------------------------------------------------------------------------------------------------------------------------------------------------------------------------------------------------------------|----------|------------------|
|                                                                                                          | <p>请遵循 GCP 原则、遵循伦理委员会批准的方案开展临床研究，保护受试者的健康与权利。</p> <p>若在三年内未启动研究，本批件作废，需重新提交伦理审查申请。</p> <p>研究过程中若变更主要研究者，对临床研究方案、知情同意书、招募材料等的任何修改，请申请人提交修正审查申请。</p> <p>如发生严重不良事件以及影响研究风险受益比的非预期不良事件，请申请人在获知后 15 个工作日内提交严重不良事件报告，如果是致死的不良反应，请在获知后立即提交严重不良事件报告。</p> <p>请按照伦理委员会规定的年度/定期跟踪审查频率，申请人在截止日期前 1 个月提交研究进展报告；申办者应当向组长单位伦理委员会提交各中心研究进展的汇总报告；当出现任何可能显著影响试验进行或增加受试者危险的情况时，请申请人及时向伦理委员会提交书面报告。</p> <p>研究纳入了不符合纳入标准或符合排除标准的受试者，符合中止试验规定而未让受试者退出研究，给予错误治疗或剂量，给予方案禁止的合并用药等没有遵从方案开展研究的情况；或可能对受试者的权益/健康以及研究的科学性造成不良影响等违背 GCP 原则的情况，请申办者/监查员/研究者提交违背方案报告。</p> <p>提前终止或完成临床研究，请及时提交研究完成报告。</p> |          |                  |
| 批件有效期                                                                                                    | 2018 年 12 月 30 日—2019 年 12 月 29 日                                                                                                                                                                                                                                                                                                                                                                                                                                                                                                                                        |          |                  |
| 跟踪审查频率                                                                                                   | 12 个月                                                                                                                                                                                                                                                                                                                                                                                                                                                                                                                                                                    | 跟踪审查截止日期 | 2019 年 12 月 29 日 |
| 联系人与联系方式                                                                                                 | 联系人:马静华      联系电话: 0535-6597012<br>Email:kjk2127022@163.com                                                                                                                                                                                                                                                                                                                                                                                                                                                                                                              |          |                  |
| 主任委员/副主任委员签字                                                                                             | 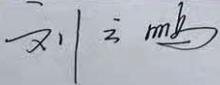                                                                                                                                                                                                                                                                                                                                                                                                                                                                                      |          |                  |
| <br>烟台市中医医院伦理委员会(盖章) |                                                                                                                                                                                                                                                                                                                                                                                                                                                                                                                                                                          |          |                  |
| 日期: 2018 年 12 月 29 日                                                                                     |                                                                                                                                                                                                                                                                                                                                                                                                                                                                                                                                                                          |          |                  |
