# Supplementary material for: Effects of Electroacupuncture for Opioid-Induced Constipation in Patients With Cancer in China: A Randomized Clinical Trial
Source: PubMed Central journal article supplement (PMC9947731; doi:10.1001/jamanetworkopen.2023.0310), 2023-02-22
Supplement: jamanetwopen-e230310-s003.pdf [file jamanetwopen-e230310-s003.pdf]

## Data Sharing Statement

Wang. Effects of Electroacupuncture for Opioid-Induced Constipation in Patients With Cancer in China. *JAMA Netw Open*. Published February 22, 2023.

doi:10.1001/jamanetworkopen.2023.0310

### Data

**Data available:** Yes

**Data types:** Participant data with identifiers

**How to access data:** A formal request with a methodologically sound proposal should be sent to Dr. Zhishun Liu (e-mail, [zhishunjournal@163.com](mailto:zhishunjournal@163.com)).

**When available:** beginning date: 12-31-2023

### Supporting Documents

**Document types:** Statistical/analytic code

**How to access documents:** A formal request with a methodologically sound proposal should be sent to Dr. Zhishun Liu (e-mail, [zhishunjournal@163.com](mailto:zhishunjournal@163.com)).

**When available:** beginning date: 12-31-2023

### Additional Information

**Who can access the data:** The data and documents will be available to researchers whose proposal has been approved for a specified purpose.

**Types of analyses:** A formal request with a methodologically sound proposal.

**Mechanisms of data availability:** Researchers whose proposal has been approved will be required to sign a data access agreement

**Any additional restrictions:** none
